# Supplementary material
Source: publisher figshare collection journal article supplement (https://diabetesjournals.figshare.com/ndownloader/files/33660812)
Supplement: Supplementary file 1 [file 33660812]

## Sheet: Dataset
	The present dataset summarizes data used for meta-analyses presented in Morze et al. 2022
	Remaining 2383 estimates (out of 4416 extracted) could not be annotated or less than two studies per comparison were available
No	Reference	Study name	Effect measure	Compound name	log(Risk Estimate)	log(Standard Error)
37	Ahola-Olli et al. 2019	DILGOM	OR	3-hydroxybutyrate	0.363193	0.239842
38	Ahola-Olli et al. 2019	NFBC-1966	OR	3-hydroxybutyrate	-0.005954	0.0801384
76	Ahola-Olli et al. 2019	DILGOM	OR	Arachidonate	0.261859	0.24041
77	Ahola-Olli et al. 2019	FINRISK-1997	OR	Arachidonate	0.160507	0.107821
78	Ahola-Olli et al. 2019	NFBC-1966	OR	Arachidonate	0.21311	0.0721184
79	Ahola-Olli et al. 2019	YFS	OR	Arachidonate	0.0355211	0.13137
83	Ahola-Olli et al. 2019	DILGOM	OR	Acetoacetate	0.395265	0.218638
84	Ahola-Olli et al. 2019	FINRISK-1997	OR	Acetoacetate	0.0688159	0.103964
85	Ahola-Olli et al. 2019	NFBC-1966	OR	Acetoacetate	-0.0014691	0.0759864
86	Ahola-Olli et al. 2019	YFS	OR	Acetoacetate	0.218836	0.124415
400	Ahola-Olli et al. 2019	DILGOM	OR	Alanine	0.366482	0.25814
401	Ahola-Olli et al. 2019	FINRISK-1997	OR	Alanine	0.0928759	0.108718
402	Ahola-Olli et al. 2019	NFBC-1966	OR	Alanine	0.0752207	0.073387
403	Ahola-Olli et al. 2019	YFS	OR	Alanine	0.251422	0.131253
552	Ahola-Olli et al. 2019	DILGOM	OR	Citrate	-0.0310496	0.280826
553	Ahola-Olli et al. 2019	FINRISK-1997	OR	Citrate	-0.17462	0.120203
554	Ahola-Olli et al. 2019	NFBC-1966	OR	Citrate	-0.0858404	0.0785836
555	Ahola-Olli et al. 2019	YFS	OR	Citrate	0.00697855	0.142097
582	Ahola-Olli et al. 2019	DILGOM	OR	Creatinine	-0.495978	0.308515
583	Ahola-Olli et al. 2019	FINRISK-1997	OR	Creatinine	-0.0712114	0.134436
584	Ahola-Olli et al. 2019	NFBC-1966	OR	Creatinine	-0.0941736	0.0996577
585	Ahola-Olli et al. 2019	YFS	OR	Creatinine	0.0600393	0.149416
650	Ahola-Olli et al. 2019	DILGOM	OR	Docosahexaenoate	0.199545	0.222984
651	Ahola-Olli et al. 2019	FINRISK-1997	OR	Docosahexaenoate	0.120283	0.0969439
652	Ahola-Olli et al. 2019	NFBC-1966	OR	Docosahexaenoate	0.188775	0.0674187
653	Ahola-Olli et al. 2019	YFS	OR	Docosahexaenoate	0.118122	0.121388
705	Ahola-Olli et al. 2019	DILGOM	OR	Glutamine	-0.274691	0.277575
706	Ahola-Olli et al. 2019	FINRISK-1997	OR	Glutamine	-0.304737	0.103105
707	Ahola-Olli et al. 2019	NFBC-1966	OR	Glutamine	-0.0955295	0.0826285
708	Ahola-Olli et al. 2019	YFS	OR	Glutamine	-0.116417	0.14348
724	Ahola-Olli et al. 2019	DILGOM	OR	Glycerol	-0.0437758	0.278923
725	Ahola-Olli et al. 2019	FINRISK-1997	OR	Glycerol	0.189462	0.0941043
726	Ahola-Olli et al. 2019	NFBC-1966	OR	Glycerol	0.192547	0.0712362
727	Ahola-Olli et al. 2019	YFS	OR	Glycerol	0.276053	0.125233
740	Ahola-Olli et al. 2019	DILGOM	OR	Glycine	-0.113299	0.281109
741	Ahola-Olli et al. 2019	FINRISK-1997	OR	Glycine	-0.150257	0.13283
742	Ahola-Olli et al. 2019	NFBC-1966	OR	Glycine	-0.0343228	0.0823625
743	Ahola-Olli et al. 2019	YFS	OR	Glycine	-0.115438	0.148189
801	Ahola-Olli et al. 2019	DILGOM	OR	Histidine	0.0642263	0.269044
802	Ahola-Olli et al. 2019	FINRISK-1997	OR	Histidine	-0.0214161	0.110973
803	Ahola-Olli et al. 2019	NFBC-1966	OR	Histidine	0.0898646	0.0744209
804	Ahola-Olli et al. 2019	YFS	OR	Histidine	0.00165012	0.139418
879	Ahola-Olli et al. 2019	DILGOM	OR	Linoleate	0.449019	0.272441
880	Ahola-Olli et al. 2019	FINRISK-1997	OR	Linoleate	0.134968	0.107162
881	Ahola-Olli et al. 2019	NFBC-1966	OR	Linoleate	-0.0064051	0.0757391
882	Ahola-Olli et al. 2019	YFS	OR	Linoleate	-0.0015174	0.133738
890	Ahola-Olli et al. 2019	DILGOM	OR	Lactate	0.468462	0.272281
891	Ahola-Olli et al. 2019	FINRISK-1997	OR	Lactate	0.207445	0.104215
892	Ahola-Olli et al. 2019	NFBC-1966	OR	Lactate	-0.0410968	0.0769447
893	Ahola-Olli et al. 2019	YFS	OR	Lactate	0.291794	0.11025
906	Ahola-Olli et al. 2019	DILGOM	OR	Leucine	0.363111	0.208516
907	Ahola-Olli et al. 2019	FINRISK-1997	OR	Leucine	0.19469	0.10053
908	Ahola-Olli et al. 2019	NFBC-1966	OR	Leucine	0.267921	0.0705266
909	Ahola-Olli et al. 2019	YFS	OR	Leucine	0.44487	0.121588
1509	Ahola-Olli et al. 2019	DILGOM	OR	Pyruvate	0.437298	0.234656
1510	Ahola-Olli et al. 2019	FINRISK-1997	OR	Pyruvate	0.148136	0.0779945
1511	Ahola-Olli et al. 2019	NFBC-1966	OR	Pyruvate	-0.0372494	0.076735
1512	Ahola-Olli et al. 2019	YFS	OR	Pyruvate	0.114837	0.113762
35	Ahola-Olli et al. 2019	FINRISK-1997	OR	3-hydroxybutyrate	0.00202874	0.120141
36	Ahola-Olli et al. 2019	YFS	OR	3-hydroxybutyrate	0.312827	0.113832
850	Chen et al. 2016	SHDS	OR	Isoleucine	0.631272	0.151774
910	Chen et al. 2016	SHDS	OR	Leucine	0.512824	0.131496
1457	Chen et al. 2016	SHDS	OR	Phenylalanine	0.553885	0.145801
1979	Chen et al. 2016	SHDS	OR	Tyrosine	0.625938	0.151774
2010	Chen et al. 2016	SHDS	OR	Valine	0.908259	0.205843
1	Chen et al. 2019	DPP	HR	1,5-anhydrosorbitol	-0.0943107	0.0423793
6	Chen et al. 2019	DPP	HR	1-methylnicotinamide	-0.040822	0.0503906
14	Chen et al. 2019	DPP	HR	2-hydroxybutyrate	0.10436	0.0460893
22	Chen et al. 2019	DPP	HR	2-hydroxyglutarate	0.0392207	0.0317762
39	Chen et al. 2019	DPP	HR	3-hydroxybutyrate	-0.0304592	0.0581081
58	Chen et al. 2019	DPP	HR	3-methyl-2-oxobutyrate	0.00995033	0.060906
64	Chen et al. 2019	DPP	HR	3-methyl-2-oxovalerate	0.0295588	0.0569244
70	Chen et al. 2019	DPP	HR	4-hydroxyphenylpyruvate	0	0.0557881
87	Chen et al. 2019	DPP	HR	Acetoacetate	-0.0618754	0.0593424
103	Chen et al. 2019	DPP	HR	Acylcarnitine C12	-0.0304592	0.0657727
114	Chen et al. 2019	DPP	HR	Acylcarnitine C12:1	-0.0833816	0.0581658
131	Chen et al. 2019	DPP	HR	Acylcarnitine C14	-0.0202027	0.0598399
141	Chen et al. 2019	DPP	HR	Acylcarnitine C14:1	-0.116534	0.0626716
154	Chen et al. 2019	DPP	HR	Acylcarnitine C14:2	-0.105361	0.0651849
165	Chen et al. 2019	DPP	HR	Acylcarnitine C16	-0.0618754	0.0599795
195	Chen et al. 2019	DPP	HR	Acylcarnitine C16OH	-0.0304592	0.0522435
199	Chen et al. 2019	DPP	HR	Acylcarnitine C18	-0.0202027	0.0673856
213	Chen et al. 2019	DPP	HR	Acylcarnitine C18:1	-0.18633	0.0644988
224	Chen et al. 2019	DPP	HR	Acylcarnitine C18:1OH	-0.0100503	0.0812382
228	Chen et al. 2019	DPP	HR	Acylcarnitine C18:2	-0.127833	0.0725477
244	Chen et al. 2019	DPP	HR	Acylcarnitine C2	0.00995033	0.0552368
260	Chen et al. 2019	DPP	HR	Acylcarnitine C20	-0.0512933	0.0641108
271	Chen et al. 2019	DPP	HR	Acylcarnitine C26	0.0295588	0.0641108
273	Chen et al. 2019	DPP	HR	Acylcarnitine C3	0.0582689	0.031178
294	Chen et al. 2019	DPP	HR	Acylcarnitine C4	0.0676586	0.0452057
308	Chen et al. 2019	DPP	HR	Acylcarnitine C4DC	0.0861777	0.0584975
312	Chen et al. 2019	DPP	HR	Acylcarnitine C4OH	0.0582689	0.0408073
318	Chen et al. 2019	DPP	HR	Acylcarnitine C5	0.122218	0.0428045
332	Chen et al. 2019	DPP	HR	Acylcarnitine C5:1	0.0295588	0.0469625
338	Chen et al. 2019	DPP	HR	Acylcarnitine C5DC	0.182322	0.0531168
351	Chen et al. 2019	DPP	HR	Acylcarnitine C6	0.0198026	0.0647399
368	Chen et al. 2019	DPP	HR	Acylcarnitine C7	0.00995033	0.0580557
375	Chen et al. 2019	DPP	HR	Acylcarnitine C8	-0.040822	0.0871809
395	Chen et al. 2019	DPP	HR	Acylcarnitine C9	-0.0512933	0.0587188
404	Chen et al. 2019	DPP	HR	Alanine	0.0487902	0.053137
427	Chen et al. 2019	DPP	HR	Oxoglutarate	0.0582689	0.043016
434	Chen et al. 2019	DPP	HR	3-aminoisobutanate	-0.0100503	0.0563505
437	Chen et al. 2019	DPP	HR	Arginine	0	0.0535001
450	Chen et al. 2019	DPP	HR	Asparagine	-0.150823	0.0562609
458	Chen et al. 2019	DPP	HR	Aspartate	0.0487902	0.0438394
467	Chen et al. 2019	DPP	HR	Beta-alanine	-0.0725707	0.0544832
471	Chen et al. 2019	DPP	HR	Betaine	-0.210721	0.0660992
481	Chen et al. 2019	DPP	HR	Carnitine	0.0487902	0.0580076
511	Chen et al. 2019	DPP	HR	Cer d18:1/16:0	-0.0202027	0.0598399
524	Chen et al. 2019	DPP	HR	Cer d18:1/22:0	0.0953102	0.0532911
529	Chen et al. 2019	DPP	HR	Cer d18:1/24:0	0.0582689	0.053137
533	Chen et al. 2019	DPP	HR	Cer d18:1/24:1	0.076961	0.0563978
543	Chen et al. 2019	DPP	HR	Choline	0.0295588	0.0619211
558	Chen et al. 2019	DPP	HR	Citrulline	-0.0202027	0.0441375
574	Chen et al. 2019	DPP	HR	Cotinine	0.113329	0.0365053
577	Chen et al. 2019	DPP	HR	Creatine	0.0676586	0.0547896
600	Chen et al. 2019	DPP	HR	Deoxycholate	0	0.0557881
604	Chen et al. 2019	DPP	HR	DG 30:0	0.14842	0.0372915
607	Chen et al. 2019	DPP	HR	DG 32:0	0.19062	0.0357517
609	Chen et al. 2019	DPP	HR	DG 32:1	0.165514	0.0389896
612	Chen et al. 2019	DPP	HR	DG 32:2	0.139762	0.0379452
615	Chen et al. 2019	DPP	HR	DG 34:0	0.113329	0.0365053
622	Chen et al. 2019	DPP	HR	DG 34:2	0.182322	0.0488403
628	Chen et al. 2019	DPP	HR	DG 34:3	0.165514	0.0520651
630	Chen et al. 2019	DPP	HR	DG 36:1	0.165514	0.0366599
633	Chen et al. 2019	DPP	HR	DG 36:2	0.139762	0.0485272
638	Chen et al. 2019	DPP	HR	DG 36:3	0.113329	0.0589571
643	Chen et al. 2019	DPP	HR	DG 36:4	0.076961	0.0590414
646	Chen et al. 2019	DPP	HR	DG 38:4	0.182322	0.0445707
648	Chen et al. 2019	DPP	HR	DG 38:5	0.14842	0.0440926
662	Chen et al. 2019	DPP	HR	Dimethylglycine	0.0582689	0.00962763
680	Chen et al. 2019	DPP	HR	Fumarate	-0.105361	0.0619761
683	Chen et al. 2019	DPP	HR	Gluconate	0.0392207	0.0389482
692	Chen et al. 2019	DPP	HR	Glutamate	0.076961	0.0516644
709	Chen et al. 2019	DPP	HR	Glutamine	-0.162519	0.0603033
733	Chen et al. 2019	DPP	HR	Glycerophosphocholine	0.076961	0.0495296
744	Chen et al. 2019	DPP	HR	Glycine	-0.198451	0.0680175
758	Chen et al. 2019	DPP	HR	Glycochenodeoxycholate	0.0392207	0.0536468
762	Chen et al. 2019	DPP	HR	Glycocholate	0.0582689	0.0385793
789	Chen et al. 2019	DPP	HR	Hippurate	-0.0618754	0.0593424
798	Chen et al. 2019	DPP	HR	Histamine	-0.0202027	0.0389234
805	Chen et al. 2019	DPP	HR	Histidine	-0.0512933	0.0587188
821	Chen et al. 2019	DPP	HR	Hydrooxyproline	0.0295588	0.0541665
824	Chen et al. 2019	DPP	HR	Hypoxanthine	0.0676586	0.0590414
834	Chen et al. 2019	DPP	HR	Indolelactate	0.0861777	0.0511915
837	Chen et al. 2019	DPP	HR	Indolepropionate	-0.0618754	0.0617378
851	Chen et al. 2019	DPP	HR	Isoleucine	0.131028	0.0358627
869	Chen et al. 2019	DPP	HR	Kynurenate	-0.0943107	0.0475331
873	Chen et al. 2019	DPP	HR	Kynurenine	0.00995033	0.0580557
894	Chen et al. 2019	DPP	HR	Lactate	0.0861777	0.0490745
911	Chen et al. 2019	DPP	HR	Leucine	0.0861777	0.0537814
933	Chen et al. 2019	DPP	HR	LPC 14:0	0.0487902	0.0509463
943	Chen et al. 2019	DPP	HR	LPC 16:0	0.0582689	0.055307
954	Chen et al. 2019	DPP	HR	LPC 16:1	-0.0512933	0.0617367
975	Chen et al. 2019	DPP	HR	LPC 18:0	0.0295588	0.0569234
988	Chen et al. 2019	DPP	HR	LPC 18:1	-0.0618754	0.0671648
1001	Chen et al. 2019	DPP	HR	LPC 18:2	-0.116534	0.0709222
1030	Chen et al. 2019	DPP	HR	LPC 20:3	0.0487902	0.0558355
1037	Chen et al. 2019	DPP	HR	LPC 20:4	-0.0202027	0.0598388
1046	Chen et al. 2019	DPP	HR	LPC 20:5	-0.0202027	0.0650964
1053	Chen et al. 2019	DPP	HR	LPC 22:6	-0.0304592	0.0575092
1063	Chen et al. 2019	DPP	HR	LPE 16:0	0.0953102	0.0460885
1071	Chen et al. 2019	DPP	HR	LPE 18:0	0.10436	0.0502705
1079	Chen et al. 2019	DPP	HR	LPE 18:1	0.0582689	0.0650223
1086	Chen et al. 2019	DPP	HR	LPE 18:2	-0.0202027	0.0621473
1093	Chen et al. 2019	DPP	HR	LPE 20:4	0	0.0586373
1099	Chen et al. 2019	DPP	HR	LPE 22:6	0.00995033	0.0557871
1106	Chen et al. 2019	DPP	HR	Lysine	0.0487902	0.0509473
1117	Chen et al. 2019	DPP	HR	Malate	0.0676586	0.0547896
1126	Chen et al. 2019	DPP	HR	Methionine	-0.0202027	0.0650977
1138	Chen et al. 2019	DPP	HR	MG 16:1	-0.174353	0.526182
1142	Chen et al. 2019	DPP	HR	MG 18:1	0.0392207	0.044263
1158	Chen et al. 2019	DPP	HR	Niacinamide	-0.0304592	0.0498704
1163	Chen et al. 2019	DPP	HR	NMMA	0.0953102	0.0465106
1174	Chen et al. 2019	DPP	HR	Ornithine	0.0295588	0.0541665
1192	Chen et al. 2019	DPP	HR	Pantothenate	-0.0512933	0.0749391
1202	Chen et al. 2019	DPP	HR	PC 30:0	0.10436	0.0528088
1207	Chen et al. 2019	DPP	HR	PC 30:1	0.0953102	0.0532902
1211	Chen et al. 2019	DPP	HR	PC 32:0	0.0861777	0.0537804
1218	Chen et al. 2019	DPP	HR	PC 32:1	0.10436	0.0528088
1227	Chen et al. 2019	DPP	HR	PC 32:2	0.076961	0.0611399
1247	Chen et al. 2019	DPP	HR	PC 34:0	-0.0202027	0.0621474
1253	Chen et al. 2019	DPP	HR	PC 34:1	0.0295588	0.0563741
1260	Chen et al. 2019	DPP	HR	PC 34:2	0.076961	0.0658935
1269	Chen et al. 2019	DPP	HR	PC 34:3	-0.0100503	0.0644352
1278	Chen et al. 2019	DPP	HR	PC 34:4	0.076961	0.0590403
1287	Chen et al. 2019	DPP	HR	PC 36:0	-0.116534	0.0601322
1291	Chen et al. 2019	DPP	HR	PC 36:1	-0.0100503	0.0511906
1297	Chen et al. 2019	DPP	HR	PC 36:2	0.00995033	0.0580546
1306	Chen et al. 2019	DPP	HR	PC 36:3	0.00995033	0.0603021
1312	Chen et al. 2019	DPP	HR	PC 36:4	0.027334	0.042765
1334	Chen et al. 2019	DPP	HR	PC 38:2	0.00995033	0.055787
1341	Chen et al. 2019	DPP	HR	PC 38:3	0.0861777	0.0516634
1348	Chen et al. 2019	DPP	HR	PC 38:4	-0.040822	0.0581071
1359	Chen et al. 2019	DPP	HR	PC 38:6	-0.0833816	0.0637595
1383	Chen et al. 2019	DPP	HR	PC 40:6	0.076961	0.0516634
1392	Chen et al. 2019	DPP	HR	PC 40:9	-0.0943107	0.0644637
1419	Chen et al. 2019	DPP	HR	PE 34:2	0.215111	0.0453785
1423	Chen et al. 2019	DPP	HR	PE 36:1	0.182322	0.0403064
1426	Chen et al. 2019	DPP	HR	PE 36:2	0.231112	0.0465098
1430	Chen et al. 2019	DPP	HR	PE 36:3	0.165514	0.0516237
1433	Chen et al. 2019	DPP	HR	PE 36:4	0.198851	0.0480373
1440	Chen et al. 2019	DPP	HR	PE 38:4	0.207014	0.0518166
1444	Chen et al. 2019	DPP	HR	PE 38:5	0.122218	0.0584343
1448	Chen et al. 2019	DPP	HR	PE 38:6	0.157004	0.0500943
1451	Chen et al. 2019	DPP	HR	PE 40:6	0.198851	0.0503458
1458	Chen et al. 2019	DPP	HR	Phenylalanine	0.0392207	0.0563752
1475	Chen et al. 2019	DPP	HR	Phosphocholine	0.0487902	0.0487386
1478	Chen et al. 2019	DPP	HR	PI 34:0	0	0.0534991
1480	Chen et al. 2019	DPP	HR	PI 34:1	0.10436	0.0435751
1494	Chen et al. 2019	DPP	HR	PI 38:4	0.0487902	0.0580065
1504	Chen et al. 2019	DPP	HR	Pseudouridine	0.0861777	0.0584975
1507	Chen et al. 2019	DPP	HR	Putrescine	-0.0943107	0.0701385
1513	Chen et al. 2019	DPP	HR	Pyruvate	0	0.0511915
1520	Chen et al. 2019	DPP	HR	Quinolinate	-0.0202027	0.0569244
1522	Chen et al. 2019	DPP	HR	Sarcosine	-0.0202027	0.0598399
1526	Chen et al. 2019	DPP	HR	SDMA+ADMA	-0.040822	0.0426158
1535	Chen et al. 2019	DPP	HR	Serine	-0.150823	0.0589045
1547	Chen et al. 2019	DPP	HR	Serotonin	-0.0202027	0.0517121
1551	Chen et al. 2019	DPP	HR	SM 32:1	-0.116534	0.0575694
1568	Chen et al. 2019	DPP	HR	SM 34:1	-0.198451	0.0590125
1579	Chen et al. 2019	DPP	HR	SM 34:2	-0.223144	0.0669297
1593	Chen et al. 2019	DPP	HR	SM 36:1	-0.139262	0.0641108
1604	Chen et al. 2019	DPP	HR	SM 36:2	-0.210721	0.0724756
1614	Chen et al. 2019	DPP	HR	SM 36:3	-0.235722	0.0706003
1622	Chen et al. 2019	DPP	HR	SM 38:1	-0.139262	0.0556128
1639	Chen et al. 2019	DPP	HR	SM 40:1	-0.105361	0.0562937
1646	Chen et al. 2019	DPP	HR	SM 40:2	-0.198451	0.0617704
1661	Chen et al. 2019	DPP	HR	SM 42:1	-0.0833816	0.0581658
1670	Chen et al. 2019	DPP	HR	SM 42:2	-0.127833	0.0608191
1688	Chen et al. 2019	DPP	HR	Spermidine	-0.150823	0.116643
1693	Chen et al. 2019	DPP	HR	Sphingosine	-0.0618754	0.0990366
1701	Chen et al. 2019	DPP	HR	Succinate	0.0198026	0.0300467
1705	Chen et al. 2019	DPP	HR	Taurine	-0.040822	0.0401511
1711	Chen et al. 2019	DPP	HR	Taurochenodeoxycholate	0.0198026	0.042407
1715	Chen et al. 2019	DPP	HR	Taurocholate	0.0582689	0.0337418
1717	Chen et al. 2019	DPP	HR	Taurodeoxycholate	0.0198026	0.042407
1721	Chen et al. 2019	DPP	HR	TG 46:1	0.239017	0.0461438
1724	Chen et al. 2019	DPP	HR	TG 46:2	0.231112	0.0443019
1727	Chen et al. 2019	DPP	HR	TG 48:0	0.24686	0.0399411
1732	Chen et al. 2019	DPP	HR	TG 48:1	0.24686	0.0475985
1739	Chen et al. 2019	DPP	HR	TG 48:2	0.215111	0.0532538
1745	Chen et al. 2019	DPP	HR	TG 48:3	0.198851	0.0541262
1751	Chen et al. 2019	DPP	HR	TG 48:4	0.207014	0.0499348
1755	Chen et al. 2019	DPP	HR	TG 50:0	0.231112	0.0405777
1761	Chen et al. 2019	DPP	HR	TG 50:1	0.29267	0.053101
1767	Chen et al. 2019	DPP	HR	TG 50:2	0.254642	0.0529692
1775	Chen et al. 2019	DPP	HR	TG 50:3	0.173953	0.0622141
1782	Chen et al. 2019	DPP	HR	TG 50:4	0.10436	0.0574392
1787	Chen et al. 2019	DPP	HR	TG 50:5	0.122218	0.054386
1792	Chen et al. 2019	DPP	HR	TG 50:6	0.198851	0.0545732
1806	Chen et al. 2019	DPP	HR	TG 52:1	0.231112	0.0483525
1815	Chen et al. 2019	DPP	HR	TG 52:3	0.10436	0.0594882
1821	Chen et al. 2019	DPP	HR	TG 52:4	0.0487902	0.0580076
1825	Chen et al. 2019	DPP	HR	TG 52:5	0.0198026	0.0597124
1828	Chen et al. 2019	DPP	HR	TG 52:6	0.0676586	0.0547896
1833	Chen et al. 2019	DPP	HR	TG 52:7	0.10436	0.0553736
1842	Chen et al. 2019	DPP	HR	TG 54:1	0.157004	0.0413408
1846	Chen et al. 2019	DPP	HR	TG 54:2	0.165514	0.0496698
1850	Chen et al. 2019	DPP	HR	TG 54:3	0.10436	0.0594882
1856	Chen et al. 2019	DPP	HR	TG 54:4	-0.0100503	0.059233
1862	Chen et al. 2019	DPP	HR	TG 54:5	0.0295588	0.0641108
1868	Chen et al. 2019	DPP	HR	TG 54:6	0.14842	0.0525133
1874	Chen et al. 2019	DPP	HR	TG 54:7	0.10436	0.0548754
1880	Chen et al. 2019	DPP	HR	TG 54:8	0.0487902	0.053137
1883	Chen et al. 2019	DPP	HR	TG 54:9	0.0487902	0.0580076
1888	Chen et al. 2019	DPP	HR	TG 56:10	0.0392207	0.0563752
1891	Chen et al. 2019	DPP	HR	TG 56:3	0.157004	0.0457147
1894	Chen et al. 2019	DPP	HR	TG 56:4	0.139762	0.0579228
1897	Chen et al. 2019	DPP	HR	TG 56:5	0.10436	0.0528097
1907	Chen et al. 2019	DPP	HR	TG 56:7	0.113329	0.0609737
1911	Chen et al. 2019	DPP	HR	TG 56:8	0.0582689	0.0601604
1916	Chen et al. 2019	DPP	HR	TG 56:9	0.0392207	0.0563752
1919	Chen et al. 2019	DPP	HR	TG 58:10	0.0392207	0.0613228
1922	Chen et al. 2019	DPP	HR	TG 58:11	0.0392207	0.0563752
1924	Chen et al. 2019	DPP	HR	TG 58:7	0.0861777	0.0605799
1926	Chen et al. 2019	DPP	HR	TG 58:8	0.0582689	0.0671406
1929	Chen et al. 2019	DPP	HR	TG 58:9	0.0392207	0.0634939
1932	Chen et al. 2019	DPP	HR	TG 60:12	0.0198026	0.0647399
1940	Chen et al. 2019	DPP	HR	Threonine	-0.0512933	0.0563234
1949	Chen et al. 2019	DPP	HR	Trimethylamine N-oxide	0.0861777	0.0396847
1965	Chen et al. 2019	DPP	HR	Tryptophan	-0.0100503	0.059233
1980	Chen et al. 2019	DPP	HR	Tyrosine	0.0198026	0.0597124
2002	Chen et al. 2019	DPP	HR	Urate	0.0953102	0.0600291
2011	Chen et al. 2019	DPP	HR	Valine	0.10436	0.0548754
2029	Chen et al. 2019	DPP	HR	Xanthine	0.0392207	0.0514381
512	Chen et al. 2020	HCHS/SOL	RR	Cer d18:1/16:0	0.25194	0.0419689
515	Chen et al. 2020	HCHS/SOL	RR	Cer d18:1/18:0	0.40898	0.0457842
1552	Chen et al. 2020	HCHS/SOL	RR	SM 32:1	0.162203	0.0438766
1559	Chen et al. 2020	HCHS/SOL	RR	SM 32:2	0.124812	0.0515073
1563	Chen et al. 2020	HCHS/SOL	RR	SM 33:1	-0.0920525	0.0419689
1565	Chen et al. 2020	HCHS/SOL	RR	SM 34:0	0.139768	0.0476919
1569	Chen et al. 2020	HCHS/SOL	RR	SM 34:1	-0.0471839	0.0457842
1580	Chen et al. 2020	HCHS/SOL	RR	SM 34:2	0.207071	0.059138
1589	Chen et al. 2020	HCHS/SOL	RR	SM 35:1	-0.0397058	0.0457842
1591	Chen et al. 2020	HCHS/SOL	RR	SM 36:0	0.580976	0.0419689
1594	Chen et al. 2020	HCHS/SOL	RR	SM 36:1	0.207071	0.0438766
1605	Chen et al. 2020	HCHS/SOL	RR	SM 36:2	0.274374	0.0553226
1615	Chen et al. 2020	HCHS/SOL	RR	SM 36:3	-0.054662	0.0553226
1620	Chen et al. 2020	HCHS/SOL	RR	SM 38:0	0.461326	0.0400612
1623	Chen et al. 2020	HCHS/SOL	RR	SM 38:1	0.154725	0.0419689
1628	Chen et al. 2020	HCHS/SOL	RR	SM 38:2	-0.107009	0.0553226
1633	Chen et al. 2020	HCHS/SOL	RR	SM 38:3	-0.0845744	0.0534149
1635	Chen et al. 2020	HCHS/SOL	RR	SM 39:1	0.109856	0.0476919
1637	Chen et al. 2020	HCHS/SOL	RR	SM 40:0	0.580976	0.0381535
1640	Chen et al. 2020	HCHS/SOL	RR	SM 40:1	0.356633	0.0457842
1647	Chen et al. 2020	HCHS/SOL	RR	SM 40:2	-0.0247496	0.0476919
1651	Chen et al. 2020	HCHS/SOL	RR	SM 41:1	0.192115	0.0495996
1655	Chen et al. 2020	HCHS/SOL	RR	SM 41:2	-0.0172716	0.0495996
1659	Chen et al. 2020	HCHS/SOL	RR	SM 41:3	-0.0322277	0.059138
1662	Chen et al. 2020	HCHS/SOL	RR	SM 42:1	0.274374	0.0438766
1671	Chen et al. 2020	HCHS/SOL	RR	SM 42:2	0.162203	0.0515073
1678	Chen et al. 2020	HCHS/SOL	RR	SM 42:3	-0.107009	0.0515073
1682	Chen et al. 2020	HCHS/SOL	RR	SM 42:4	-0.241614	0.0534149
710	Cheng et al. 2012	FHS	OR	Glutamine	-0.18633	0.103435
711	Cheng et al. 2012	MDC	OR	Glutamine	-0.210721	0.0995988
518	Chew et al. 2019	SMEC	HR	Cer d18:1/18:1	0.300105	0.190975
522	Chew et al. 2019	SMEC	HR	Cer d18:1/20:1	0.173953	0.23848
527	Chew et al. 2019	SMEC	HR	Cer d18:1/22:1	0.0953102	0.325233
530	Chew et al. 2019	SMEC	HR	Cer d18:1/24:0	0.00995033	1.02422
534	Chew et al. 2019	SMEC	HR	Cer d18:1/24:1	0.173953	0.235391
537	Chew et al. 2019	SMEC	HR	Cer d18:1/26:0	-0.0725707	0.251057
539	Chew et al. 2019	SMEC	HR	Cer d18:1/26:1	-0.040822	0.205377
767	Chew et al. 2019	SMEC	HR	Hex2Cer d18:1/24:0	-0.040822	0.184433
769	Chew et al. 2019	SMEC	HR	Hex2Cer d18:1/24:1	-0.116534	0.230061
775	Chew et al. 2019	SMEC	HR	HexCer d18:1/18:0	0.0198026	0.185727
780	Chew et al. 2019	SMEC	HR	HexCer d18:1/22:0	-0.0512933	0.218634
783	Chew et al. 2019	SMEC	HR	HexCer d18:1/24:0	-0.040822	0.184433
786	Chew et al. 2019	SMEC	HR	HexCer d18:1/24:1	-0.0618754	0.214057
1553	Chew et al. 2019	SMEC	HR	SM 32:1	0.0123503	0.185029
1560	Chew et al. 2019	SMEC	HR	SM 32:2	-0.0833816	0.288452
1570	Chew et al. 2019	SMEC	HR	SM 34:1	0.258763	0.122938
1581	Chew et al. 2019	SMEC	HR	SM 34:2	-0.0618754	0.263734
1595	Chew et al. 2019	SMEC	HR	SM 36:1	0.299723	0.120458
1606	Chew et al. 2019	SMEC	HR	SM 36:2	0.139762	0.220998
1624	Chew et al. 2019	SMEC	HR	SM 38:1	0.222624	0.130591
1629	Chew et al. 2019	SMEC	HR	SM 38:2	0.139762	0.227966
1641	Chew et al. 2019	SMEC	HR	SM 40:1	0.062263	0.20321
1648	Chew et al. 2019	SMEC	HR	SM 40:2	0.0950842	0.159543
1652	Chew et al. 2019	SMEC	HR	SM 41:1	0.215111	0.29108
1656	Chew et al. 2019	SMEC	HR	SM 41:2	-0.0725707	0.251053
1663	Chew et al. 2019	SMEC	HR	SM 42:1	0.076961	0.266241
1672	Chew et al. 2019	SMEC	HR	SM 42:2	-0.0158511	0.183306
1679	Chew et al. 2019	SMEC	HR	SM 42:3	-0.0725707	0.251053
1691	Chew et al. 2019	SMEC	HR	Sphinganine	0.0487902	0.201134
1694	Chew et al. 2019	SMEC	HR	Sphingosine	0.076961	0.257928
405	de Mello et al. 2017	FDPS	OR	Alanine	0.770108	0.221046
472	de Mello et al. 2017	FDPS	OR	Betaine	-0.328504	0.161664
541	de Mello et al. 2017	FDPS	OR	Cholate	0.444686	0.176823
601	de Mello et al. 2017	FDPS	OR	Deoxycholate	0.425268	0.167374
759	de Mello et al. 2017	FDPS	OR	Glycochenodeoxycholate	0.463734	0.154626
763	de Mello et al. 2017	FDPS	OR	Glycocholate	0.576613	0.176823
838	de Mello et al. 2017	FDPS	OR	Indolepropionate	-0.597837	0.176823
852	de Mello et al. 2017	FDPS	OR	Isoleucine	0.364643	0.160521
912	de Mello et al. 2017	FDPS	OR	Leucine	0.329304	0.1612
940	de Mello et al. 2017	FDPS	OR	LPC 15:0	-0.527633	0.173765
965	de Mello et al. 2017	FDPS	OR	LPC 17:0	-0.798508	0.180775
989	de Mello et al. 2017	FDPS	OR	LPC 18:1	-0.462035	0.162565
1002	de Mello et al. 2017	FDPS	OR	LPC 18:2	-0.34249	0.159045
1022	de Mello et al. 2017	FDPS	OR	LPC 20:1	-0.653926	0.180339
1064	de Mello et al. 2017	FDPS	OR	LPE 16:0	-0.597837	0.173528
1072	de Mello et al. 2017	FDPS	OR	LPE 18:0	-0.385662	0.163461
1219	de Mello et al. 2017	FDPS	OR	PC 32:1	0.444686	0.165275
1240	de Mello et al. 2017	FDPS	OR	PC 33:2	-0.478036	0.162239
1244	de Mello et al. 2017	FDPS	OR	PC 33:3	-0.597837	0.17682
1283	de Mello et al. 2017	FDPS	OR	PC 35:2	-0.478036	0.165223
1327	de Mello et al. 2017	FDPS	OR	PC 37:4	-0.634878	0.180244
1342	de Mello et al. 2017	FDPS	OR	PC 38:3	0.371564	0.161956
1360	de Mello et al. 2017	FDPS	OR	PC 38:6	-0.478036	0.165223
1368	de Mello et al. 2017	FDPS	OR	PC 39:6	-0.579818	0.170361
1390	de Mello et al. 2017	FDPS	OR	PC 40:7	-0.693147	0.173252
1712	de Mello et al. 2017	FDPS	OR	Taurochenodeoxycholate	0.476234	0.172348
1121	Drogan et al. 2015	EPIC-Potsdam	OR	Mannitol	-0.891598	0.301529
80	Fall et al. 2016	ULFAM, PIVUS, TwinGene, KORA	HR	Arachidonate	-0.0512933	0.067166
319	Fall et al. 2016	ULFAM, PIVUS, TwinGene, KORA	HR	Acylcarnitine C5	0.19062	0.0715596
602	Fall et al. 2016	ULFAM, PIVUS, TwinGene, KORA	HR	Deoxycholate	0.165514	0.0708995
654	Fall et al. 2016	ULFAM, PIVUS, TwinGene, KORA	HR	Docosahexaenoate	-0.105361	0.0676738
760	Fall et al. 2016	ULFAM, PIVUS, TwinGene, KORA	HR	Glycochenodeoxycholate	0.076961	0.0822445
764	Fall et al. 2016	ULFAM, PIVUS, TwinGene, KORA	HR	Glycocholate	0.10436	0.0800147
790	Fall et al. 2016	ULFAM, PIVUS, TwinGene, KORA	HR	Hippurate	0.0198026	0.0669297
839	Fall et al. 2016	ULFAM, PIVUS, TwinGene, KORA	HR	Indolepropionate	-0.150823	0.0828217
883	Fall et al. 2016	ULFAM, PIVUS, TwinGene, KORA	HR	Linoleate	-0.0100503	0.0719008
902	Fall et al. 2016	ULFAM, PIVUS, TwinGene, KORA	HR	Laurate	0.00995033	0.0704728
929	Fall et al. 2016	ULFAM, PIVUS, TwinGene, KORA	HR	Linolenate	0.0295588	0.0712535
976	Fall et al. 2016	ULFAM, PIVUS, TwinGene, KORA	HR	LPC 18:0	-0.0618754	0.0458147
1019	Fall et al. 2016	ULFAM, PIVUS, TwinGene, KORA	HR	LPC 20:0	-0.0833816	0.0693696
1026	Fall et al. 2016	ULFAM, PIVUS, TwinGene, KORA	HR	LPC 20:2	-0.162519	0.069041
1073	Fall et al. 2016	ULFAM, PIVUS, TwinGene, KORA	HR	LPE 18:0	-0.0943107	0.0669284
1143	Fall et al. 2016	ULFAM, PIVUS, TwinGene, KORA	HR	MG 18:1	0.113329	0.0701135
1146	Fall et al. 2016	ULFAM, PIVUS, TwinGene, KORA	HR	MG 18:2	0.207014	0.0865346
1150	Fall et al. 2016	ULFAM, PIVUS, TwinGene, KORA	HR	Mystrate	-0.0304592	0.0733883
1169	Fall et al. 2016	ULFAM, PIVUS, TwinGene, KORA	HR	Oleate	-0.0512933	0.0749391
1298	Fall et al. 2016	ULFAM, PIVUS, TwinGene, KORA	HR	PC 36:2	-0.105361	0.0594616
1412	Fall et al. 2016	ULFAM, PIVUS, TwinGene, KORA	HR	PC 44:5	-0.040822	0.0818017
1455	Fall et al. 2016	ULFAM, PIVUS, TwinGene, KORA	HR	Pentadecanoate	-0.0618754	0.067166
1499	Fall et al. 2016	ULFAM, PIVUS, TwinGene, KORA	HR	Piperine	-0.0833816	0.0717889
1554	Fall et al. 2016	ULFAM, PIVUS, TwinGene, KORA	HR	SM 32:1	-0.105361	0.0594627
1561	Fall et al. 2016	ULFAM, PIVUS, TwinGene, KORA	HR	SM 32:2	-0.139262	0.0674455
1582	Fall et al. 2016	ULFAM, PIVUS, TwinGene, KORA	HR	SM 34:2	-0.0693008	0.0438969
1607	Fall et al. 2016	ULFAM, PIVUS, TwinGene, KORA	HR	SM 36:2	-0.0512933	0.067166
1616	Fall et al. 2016	ULFAM, PIVUS, TwinGene, KORA	HR	SM 36:3	-0.127833	0.0608191
1630	Fall et al. 2016	ULFAM, PIVUS, TwinGene, KORA	HR	SM 38:2	-0.0202027	0.0726369
1657	Fall et al. 2016	ULFAM, PIVUS, TwinGene, KORA	HR	SM 41:2	-0.0202027	0.0703693
1680	Fall et al. 2016	ULFAM, PIVUS, TwinGene, KORA	HR	SM 42:3	-0.0618754	0.0647929
1696	Fall et al. 2016	ULFAM, PIVUS, TwinGene, KORA	HR	Stearate	-0.0725707	0.0686199
1981	Fall et al. 2016	ULFAM, PIVUS, TwinGene, KORA	HR	Tyrosine	0.165514	0.0708995
617	Fernandez et al. 2020	MDC	HR	DG 34:1	0.385586	0.0434545
623	Fernandez et al. 2020	MDC	HR	DG 34:2	0.329393	0.0320579
634	Fernandez et al. 2020	MDC	HR	DG 36:2	0.28921	0.0430231
639	Fernandez et al. 2020	MDC	HR	DG 36:3	0.21957	0.0451525
644	Fernandez et al. 2020	MDC	HR	DG 36:4	-0.236638	0.0402537
934	Fernandez et al. 2020	MDC	HR	LPC 14:0	0.114565	0.0453594
944	Fernandez et al. 2020	MDC	HR	LPC 16:0	-0.0161801	0.0454684
955	Fernandez et al. 2020	MDC	HR	LPC 16:1	0.0254273	0.0453826
977	Fernandez et al. 2020	MDC	HR	LPC 18:0	0.0370027	0.0458819
990	Fernandez et al. 2020	MDC	HR	LPC 18:1	-0.241849	0.0440964
1003	Fernandez et al. 2020	MDC	HR	LPC 18:2	-0.41307	0.044843
1031	Fernandez et al. 2020	MDC	HR	LPC 20:3	-0.0400471	0.04615
1038	Fernandez et al. 2020	MDC	HR	LPC 20:4	-0.174904	0.0462243
1054	Fernandez et al. 2020	MDC	HR	LPC 22:6	-0.150735	0.044856
1065	Fernandez et al. 2020	MDC	HR	LPE 16:0	-0.195031	0.0454044
1074	Fernandez et al. 2020	MDC	HR	LPE 18:0	-0.16947	0.0437625
1080	Fernandez et al. 2020	MDC	HR	LPE 18:1	-0.306381	0.0387387
1087	Fernandez et al. 2020	MDC	HR	LPE 18:2	-0.27192	0.0436035
1094	Fernandez et al. 2020	MDC	HR	LPE 20:4	-0.32261	0.0442529
1212	Fernandez et al. 2020	MDC	HR	PC 32:0	-0.159147	0.0209625
1220	Fernandez et al. 2020	MDC	HR	PC 32:1	-0.108112	0.0218216
1228	Fernandez et al. 2020	MDC	HR	PC 32:2	0.000963735	0.0458627
1237	Fernandez et al. 2020	MDC	HR	PC 33:1	-0.115976	0.031897
1241	Fernandez et al. 2020	MDC	HR	PC 33:2	-0.275639	0.0425361
1248	Fernandez et al. 2020	MDC	HR	PC 34:0	0.0311807	0.0456046
1254	Fernandez et al. 2020	MDC	HR	PC 34:1	-0.14708	0.0175092
1261	Fernandez et al. 2020	MDC	HR	PC 34:2	-0.274783	0.018109
1270	Fernandez et al. 2020	MDC	HR	PC 34:3	-0.17074	0.0261045
1284	Fernandez et al. 2020	MDC	HR	PC 35:2	-0.143807	0.0456275
1292	Fernandez et al. 2020	MDC	HR	PC 36:1	0.028412	0.0317572
1299	Fernandez et al. 2020	MDC	HR	PC 36:2	0.00176674	0.0265669
1307	Fernandez et al. 2020	MDC	HR	PC 36:3	-0.110307	0.0182783
1313	Fernandez et al. 2020	MDC	HR	PC 36:4	-0.0992672	0.0196727
1319	Fernandez et al. 2020	MDC	HR	PC 36:5	-0.0484381	0.0315681
1328	Fernandez et al. 2020	MDC	HR	PC 37:4	-0.0601835	0.0454324
1335	Fernandez et al. 2020	MDC	HR	PC 38:2	0.00476165	0.0460093
1343	Fernandez et al. 2020	MDC	HR	PC 38:3	0.246149	0.0323652
1349	Fernandez et al. 2020	MDC	HR	PC 38:4	-0.0137562	0.0200787
1354	Fernandez et al. 2020	MDC	HR	PC 38:5	-0.0592669	0.0201623
1361	Fernandez et al. 2020	MDC	HR	PC 38:6	-0.0417113	0.0259961
1379	Fernandez et al. 2020	MDC	HR	PC 40:5	0.117105	0.0443032
1384	Fernandez et al. 2020	MDC	HR	PC 40:6	0.180164	0.0461858
1421	Fernandez et al. 2020	MDC	HR	PE 34:3	-0.0976128	0.0435321
1427	Fernandez et al. 2020	MDC	HR	PE 36:2	0.0533661	0.0320751
1431	Fernandez et al. 2020	MDC	HR	PE 36:3	-0.207944	0.0290489
1434	Fernandez et al. 2020	MDC	HR	PE 36:4	-0.139007	0.0314244
1438	Fernandez et al. 2020	MDC	HR	PE 36:5	-0.0314907	0.0446838
1441	Fernandez et al. 2020	MDC	HR	PE 38:4	0.0610951	0.0452833
1445	Fernandez et al. 2020	MDC	HR	PE 38:5	-0.167236	0.0442535
1449	Fernandez et al. 2020	MDC	HR	PE 38:6	-0.146183	0.0445157
1481	Fernandez et al. 2020	MDC	HR	PI 34:1	-0.0603661	0.0452209
1483	Fernandez et al. 2020	MDC	HR	PI 36:1	-0.0331826	0.0453206
1486	Fernandez et al. 2020	MDC	HR	PI 36:2	-0.0212463	0.0321397
1488	Fernandez et al. 2020	MDC	HR	PI 36:3	-0.148452	0.0422914
1490	Fernandez et al. 2020	MDC	HR	PI 36:4	-0.00247346	0.0312457
1492	Fernandez et al. 2020	MDC	HR	PI 38:3	0.129605	0.0457327
1495	Fernandez et al. 2020	MDC	HR	PI 38:4	0.144829	0.0448309
1497	Fernandez et al. 2020	MDC	HR	PI 38:5	-0.131011	0.0462788
1555	Fernandez et al. 2020	MDC	HR	SM 32:1	0.0695528	0.0469466
1566	Fernandez et al. 2020	MDC	HR	SM 34:0	0.140691	0.0448004
1571	Fernandez et al. 2020	MDC	HR	SM 34:1	0.0115437	0.0463116
1583	Fernandez et al. 2020	MDC	HR	SM 34:2	0.0809893	0.0491859
1596	Fernandez et al. 2020	MDC	HR	SM 36:1	0.239182	0.0463686
1608	Fernandez et al. 2020	MDC	HR	SM 36:2	0.125139	0.0492379
1625	Fernandez et al. 2020	MDC	HR	SM 38:1	0.188192	0.0460011
1631	Fernandez et al. 2020	MDC	HR	SM 38:2	0.0454055	0.0491622
1642	Fernandez et al. 2020	MDC	HR	SM 40:1	0.248167	0.0450057
1649	Fernandez et al. 2020	MDC	HR	SM 40:2	0.100253	0.0474909
1673	Fernandez et al. 2020	MDC	HR	SM 42:2	0.147883	0.0448083
1722	Fernandez et al. 2020	MDC	HR	TG 46:1	0.324017	0.0464455
1725	Fernandez et al. 2020	MDC	HR	TG 46:2	0.276444	0.0448619
1728	Fernandez et al. 2020	MDC	HR	TG 48:0	0.481847	0.0447751
1733	Fernandez et al. 2020	MDC	HR	TG 48:1	0.415317	0.0439542
1740	Fernandez et al. 2020	MDC	HR	TG 48:2	0.324772	0.0443465
1746	Fernandez et al. 2020	MDC	HR	TG 48:3	0.264951	0.045558
1753	Fernandez et al. 2020	MDC	HR	TG 49:2	0.299168	0.0450807
1762	Fernandez et al. 2020	MDC	HR	TG 50:1	0.473693	0.043394
1768	Fernandez et al. 2020	MDC	HR	TG 50:2	0.389933	0.0434607
1776	Fernandez et al. 2020	MDC	HR	TG 50:3	0.316745	0.0443775
1783	Fernandez et al. 2020	MDC	HR	TG 50:4	0.262407	0.0450601
1788	Fernandez et al. 2020	MDC	HR	TG 50:5	0.220088	0.0447399
1797	Fernandez et al. 2020	MDC	HR	TG 51:1	0.380232	0.0457301
1799	Fernandez et al. 2020	MDC	HR	TG 51:2	0.32521	0.0441269
1803	Fernandez et al. 2020	MDC	HR	TG 51:3	0.252987	0.0448329
1810	Fernandez et al. 2020	MDC	HR	TG 52:2	0.35388	0.0437543
1816	Fernandez et al. 2020	MDC	HR	TG 52:3	0.296491	0.0449145
1822	Fernandez et al. 2020	MDC	HR	TG 52:4	0.247855	0.0452738
1826	Fernandez et al. 2020	MDC	HR	TG 52:5	0.257956	0.0451227
1829	Fernandez et al. 2020	MDC	HR	TG 52:6	0.248923	0.0451433
1835	Fernandez et al. 2020	MDC	HR	TG 53:2	0.278618	0.0441193
1838	Fernandez et al. 2020	MDC	HR	TG 53:3	0.211945	0.044561
1851	Fernandez et al. 2020	MDC	HR	TG 54:3	0.248231	0.0439667
1857	Fernandez et al. 2020	MDC	HR	TG 54:4	0.181287	0.0446593
1863	Fernandez et al. 2020	MDC	HR	TG 54:5	0.206112	0.0443488
1869	Fernandez et al. 2020	MDC	HR	TG 54:6	0.273757	0.0444492
1875	Fernandez et al. 2020	MDC	HR	TG 54:7	0.254054	0.0445148
1892	Fernandez et al. 2020	MDC	HR	TG 56:3	0.285326	0.0449042
1895	Fernandez et al. 2020	MDC	HR	TG 56:4	0.240984	0.0438195
1898	Fernandez et al. 2020	MDC	HR	TG 56:5	0.276035	0.0432301
1902	Fernandez et al. 2020	MDC	HR	TG 56:6	0.238896	0.0437079
1908	Fernandez et al. 2020	MDC	HR	TG 56:7	0.262467	0.0444987
1912	Fernandez et al. 2020	MDC	HR	TG 56:8	0.230054	0.0448236
1925	Fernandez et al. 2020	MDC	HR	TG 58:7	0.237304	0.0438116
1927	Fernandez et al. 2020	MDC	HR	TG 58:8	0.191025	0.0441594
15	Ferrannini et al. 2013	BS	OR	2-hydroxybutyrate	0.231112	0.0827509
16	Ferrannini et al. 2013	FHS	OR	2-hydroxybutyrate	0.223144	0.119899
90	Floegel et al. 2013	EPIC-Potsdam	HR	Acylcarnitine C10	0.07	0.04
142	Floegel et al. 2013	EPIC-Potsdam	HR	Acylcarnitine C14:1	-0.03	0.05
155	Floegel et al. 2013	EPIC-Potsdam	HR	Acylcarnitine C14:2	0.02	0.05
166	Floegel et al. 2013	EPIC-Potsdam	HR	Acylcarnitine C16	0.11	0.05
189	Floegel et al. 2013	EPIC-Potsdam	HR	Acylcarnitine C16:2	0.08	0.05
200	Floegel et al. 2013	EPIC-Potsdam	HR	Acylcarnitine C18	0.01	0.05
214	Floegel et al. 2013	EPIC-Potsdam	HR	Acylcarnitine C18:1	0.03	0.05
229	Floegel et al. 2013	EPIC-Potsdam	HR	Acylcarnitine C18:2	-0.04	0.05
245	Floegel et al. 2013	EPIC-Potsdam	HR	Acylcarnitine C2	0.01	0.05
274	Floegel et al. 2013	EPIC-Potsdam	HR	Acylcarnitine C3	0.25	0.05
289	Floegel et al. 2013	EPIC-Potsdam	HR	Acylcarnitine C3DC	0.13	0.05
339	Floegel et al. 2013	EPIC-Potsdam	HR	Acylcarnitine C5DC	0.14	0.05
345	Floegel et al. 2013	EPIC-Potsdam	HR	Acylcarnitine C5OH	0.13	0.05
370	Floegel et al. 2013	EPIC-Potsdam	HR	Acylcarnitine C7DC	0.01	0.05
388	Floegel et al. 2013	EPIC-Potsdam	HR	Acylcarnitine C8:1	0.13	0.05
396	Floegel et al. 2013	EPIC-Potsdam	HR	Acylcarnitine C9	0.07	0.05
438	Floegel et al. 2013	EPIC-Potsdam	HR	Arginine	0.17	0.05
482	Floegel et al. 2013	EPIC-Potsdam	HR	Carnitine	0.17	0.05
712	Floegel et al. 2013	EPIC-Potsdam	HR	Glutamine	-0.16	0.05
745	Floegel et al. 2013	EPIC-Potsdam	HR	Glycine	-0.32	0.06
806	Floegel et al. 2013	EPIC-Potsdam	HR	Histidine	-0.02	0.06
853	Floegel et al. 2013	EPIC-Potsdam	HR	Isoleucine	0.26	0.05
935	Floegel et al. 2013	EPIC-Potsdam	HR	LPC 14:0	0.13	0.0499991
945	Floegel et al. 2013	EPIC-Potsdam	HR	LPC 16:0	0.08	0.0499991
956	Floegel et al. 2013	EPIC-Potsdam	HR	LPC 16:1	0.06	0.0499991
966	Floegel et al. 2013	EPIC-Potsdam	HR	LPC 17:0	-0.22	0.0599989
978	Floegel et al. 2013	EPIC-Potsdam	HR	LPC 18:0	0.02	0.0499991
991	Floegel et al. 2013	EPIC-Potsdam	HR	LPC 18:1	-0.18	0.0599989
1004	Floegel et al. 2013	EPIC-Potsdam	HR	LPC 18:2	-0.3	0.0599989
1032	Floegel et al. 2013	EPIC-Potsdam	HR	LPC 20:3	0.07	0.0499991
1039	Floegel et al. 2013	EPIC-Potsdam	HR	LPC 20:4	-0.07	0.0599989
1127	Floegel et al. 2013	EPIC-Potsdam	HR	Methionine	0.14	0.05
1175	Floegel et al. 2013	EPIC-Potsdam	HR	Ornithine	0.12	0.05
1200	Floegel et al. 2013	EPIC-Potsdam	HR	PC 28:1	-0.06	0.0499991
1203	Floegel et al. 2013	EPIC-Potsdam	HR	PC 30:0	0.0557377	0.0384104
1208	Floegel et al. 2013	EPIC-Potsdam	HR	PC 30:1	-0.12	0.0599989
1213	Floegel et al. 2013	EPIC-Potsdam	HR	PC 32:0	0.16	0.0499991
1221	Floegel et al. 2013	EPIC-Potsdam	HR	PC 32:1	0.0139024	0.0312342
1229	Floegel et al. 2013	EPIC-Potsdam	HR	PC 32:2	-0.0793442	0.0384104
1234	Floegel et al. 2013	EPIC-Potsdam	HR	PC 32:3	-0.11	0.0599989
1249	Floegel et al. 2013	EPIC-Potsdam	HR	PC 34:0	0.01	0.0599989
1255	Floegel et al. 2013	EPIC-Potsdam	HR	PC 34:1	0.0698361	0.0384103
1262	Floegel et al. 2013	EPIC-Potsdam	HR	PC 34:2	-0.0357378	0.0384104
1271	Floegel et al. 2013	EPIC-Potsdam	HR	PC 34:3	-0.149016	0.0384104
1279	Floegel et al. 2013	EPIC-Potsdam	HR	PC 34:4	0.05	0.0599989
1288	Floegel et al. 2013	EPIC-Potsdam	HR	PC 36:0	-0.025	0.0353547
1293	Floegel et al. 2013	EPIC-Potsdam	HR	PC 36:1	0.0839344	0.0384104
1300	Floegel et al. 2013	EPIC-Potsdam	HR	PC 36:2	-0.0152459	0.0384104
1308	Floegel et al. 2013	EPIC-Potsdam	HR	PC 36:3	0.0260656	0.0384104
1314	Floegel et al. 2013	EPIC-Potsdam	HR	PC 36:4	0.04	0.0353547
1320	Floegel et al. 2013	EPIC-Potsdam	HR	PC 36:5	-0.095	0.0353547
1324	Floegel et al. 2013	EPIC-Potsdam	HR	PC 36:6	-0.0800001	0.0499991
1330	Floegel et al. 2013	EPIC-Potsdam	HR	PC 38:0	-0.125	0.0353547
1332	Floegel et al. 2013	EPIC-Potsdam	HR	PC 38:1	-0.0381967	0.0384104
1336	Floegel et al. 2013	EPIC-Potsdam	HR	PC 38:2	-0.07	0.0499991
1344	Floegel et al. 2013	EPIC-Potsdam	HR	PC 38:3	0.174754	0.0384104
1350	Floegel et al. 2013	EPIC-Potsdam	HR	PC 38:4	0.01	0.0353547
1355	Floegel et al. 2013	EPIC-Potsdam	HR	PC 38:5	-0.07	0.0353547
1362	Floegel et al. 2013	EPIC-Potsdam	HR	PC 38:6	-0.0800001	0.0353547
1370	Floegel et al. 2013	EPIC-Potsdam	HR	PC 40:1	-0.14	0.0499991
1372	Floegel et al. 2013	EPIC-Potsdam	HR	PC 40:2	-0.0436066	0.0384104
1374	Floegel et al. 2013	EPIC-Potsdam	HR	PC 40:3	-0.100984	0.0384104
1376	Floegel et al. 2013	EPIC-Potsdam	HR	PC 40:4	0.0342623	0.0384104
1380	Floegel et al. 2013	EPIC-Potsdam	HR	PC 40:5	-0.0203279	0.0384104
1385	Floegel et al. 2013	EPIC-Potsdam	HR	PC 40:6	-0.0357378	0.0384104
1394	Floegel et al. 2013	EPIC-Potsdam	HR	PC 42:0	-0.36	0.0599989
1396	Floegel et al. 2013	EPIC-Potsdam	HR	PC 42:1	-0.157049	0.0384104
1398	Floegel et al. 2013	EPIC-Potsdam	HR	PC 42:2	-0.12	0.0353547
1400	Floegel et al. 2013	EPIC-Potsdam	HR	PC 42:3	-0.23	0.0599989
1402	Floegel et al. 2013	EPIC-Potsdam	HR	PC 42:4	-0.115738	0.0384104
1404	Floegel et al. 2013	EPIC-Potsdam	HR	PC 42:5	-0.072623	0.0384104
1406	Floegel et al. 2013	EPIC-Potsdam	HR	PC 42:6	0.05	0.0499991
1408	Floegel et al. 2013	EPIC-Potsdam	HR	PC 44:3	-0.05	0.0499991
1410	Floegel et al. 2013	EPIC-Potsdam	HR	PC 44:4	-0.28	0.0599989
1413	Floegel et al. 2013	EPIC-Potsdam	HR	PC 44:5	-0.35	0.0599989
1415	Floegel et al. 2013	EPIC-Potsdam	HR	PC 44:6	-0.4	0.0599989
1459	Floegel et al. 2013	EPIC-Potsdam	HR	Phenylalanine	0.3	0.05
1536	Floegel et al. 2013	EPIC-Potsdam	HR	Serine	-0.02	0.06
1572	Floegel et al. 2013	EPIC-Potsdam	HR	SM 34:1	-0.15	0.05
1584	Floegel et al. 2013	EPIC-Potsdam	HR	SM 34:2	-0.23	0.05
1597	Floegel et al. 2013	EPIC-Potsdam	HR	SM 36:1	0.02	0.05
1609	Floegel et al. 2013	EPIC-Potsdam	HR	SM 36:2	-0.13	0.06
1634	Floegel et al. 2013	EPIC-Potsdam	HR	SM 38:3	-0.08	0.06
1664	Floegel et al. 2013	EPIC-Potsdam	HR	SM 42:1	0.04	0.05
1674	Floegel et al. 2013	EPIC-Potsdam	HR	SM 42:2	-0.14	0.05
1684	Floegel et al. 2013	EPIC-Potsdam	HR	SM 44:1	-0.09	0.05
1686	Floegel et al. 2013	EPIC-Potsdam	HR	SM 44:2	-0.09	0.05
1941	Floegel et al. 2013	EPIC-Potsdam	HR	Threonine	-0.05	0.06
1966	Floegel et al. 2013	EPIC-Potsdam	HR	Tryptophan	0.22	0.06
1982	Floegel et al. 2013	EPIC-Potsdam	HR	Tyrosine	0.27	0.05
2012	Floegel et al. 2013	EPIC-Potsdam	HR	Valine	0.24	0.05
2	Gängler et al. 2019	HUNT	OR	1,5-anhydrosorbitol	-0.634878	0.201137
17	Gängler et al. 2019	HUNT	OR	2-hydroxybutyrate	0.431782	0.183813
24	Gängler et al. 2019	HUNT	OR	2-hydroxyhippurate	0.00995033	0.0631536
26	Gängler et al. 2019	HUNT	OR	2-hydroxyisobutyrate	0.431782	0.183813
40	Gängler et al. 2019	HUNT	OR	3-hydroxybutyrate	-0.0725707	0.109042
44	Gängler et al. 2019	HUNT	OR	3-hydroxydecanoate	0.254642	0.16288
51	Gängler et al. 2019	HUNT	OR	3-hydroxyoctanoate	0.0487902	0.147784
55	Gängler et al. 2019	HUNT	OR	3-methoxytyrosine	-0.116534	0.158225
59	Gängler et al. 2019	HUNT	OR	3-methyl-2-oxobutyrate	0.904218	0.253132
65	Gängler et al. 2019	HUNT	OR	3-methyl-2-oxovalerate	1.10194	0.23189
71	Gängler et al. 2019	HUNT	OR	4-hydroxyphenylpyruvate	0.364643	0.156805
72	Gängler et al. 2019	HUNT	OR	4-methyl-2-oxopentanoate	0.828552	0.213496
201	Gängler et al. 2019	HUNT	OR	Acylcarnitine C18	-0.371064	0.182083
246	Gängler et al. 2019	HUNT	OR	Acylcarnitine C2	0.0953102	0.180073
261	Gängler et al. 2019	HUNT	OR	Acylcarnitine C20	-0.328504	0.181875
272	Gängler et al. 2019	HUNT	OR	Acylcarnitine C26	-0.0618754	0.171047
313	Gängler et al. 2019	HUNT	OR	Acylcarnitine C4OH	0.157004	0.108806
406	Gängler et al. 2019	HUNT	OR	Alanine	0.444686	0.23992
421	Gängler et al. 2019	HUNT	OR	2-hydroxyisocaproate	0.438255	0.186101
424	Gängler et al. 2019	HUNT	OR	2-hydroxy-3-methylbutyrate	0	0.164111
428	Gängler et al. 2019	HUNT	OR	Oxoglutarate	0.688135	0.17323
464	Gängler et al. 2019	HUNT	OR	Benzoate	-0.162519	0.181111
473	Gängler et al. 2019	HUNT	OR	Betaine	-0.527633	0.250212
559	Gängler et al. 2019	HUNT	OR	Citrulline	0.0392207	0.225231
586	Gängler et al. 2019	HUNT	OR	Creatinine	-0.198451	0.260417
624	Gängler et al. 2019	HUNT	OR	DG 34:2	0.331957	0.103113
640	Gängler et al. 2019	HUNT	OR	DG 36:3	0.27675	0.113918
677	Gängler et al. 2019	HUNT	OR	Fructose	0.41211	0.168498
681	Gängler et al. 2019	HUNT	OR	Fumarate	-0.223144	0.210586
684	Gängler et al. 2019	HUNT	OR	Gluconate	0.405465	0.175628
688	Gängler et al. 2019	HUNT	OR	Glucose	2.30558	0.343106
693	Gängler et al. 2019	HUNT	OR	Glutamate	1.12493	0.235822
728	Gängler et al. 2019	HUNT	OR	Glycerol	0.165514	0.179878
734	Gängler et al. 2019	HUNT	OR	Glycerophosphocholine	-0.693147	0.241847
746	Gängler et al. 2019	HUNT	OR	Glycine	-0.527633	0.262658
771	Gängler et al. 2019	HUNT	OR	Hexadecanedioate	0.254642	0.154626
791	Gängler et al. 2019	HUNT	OR	Hippurate	-0.127833	0.123569
818	Gängler et al. 2019	HUNT	OR	Hydrocinnamate	-0.18633	0.116004
840	Gängler et al. 2019	HUNT	OR	Indolepropionate	0.0676586	0.113136
854	Gängler et al. 2019	HUNT	OR	Isoleucine	0.875469	0.240746
884	Gängler et al. 2019	HUNT	OR	Linoleate	-0.0943107	0.133212
895	Gängler et al. 2019	HUNT	OR	Lactate	0.625938	0.241055
913	Gängler et al. 2019	HUNT	OR	Leucine	0.667829	0.233748
930	Gängler et al. 2019	HUNT	OR	Linolenate	-0.040822	0.120737
946	Gängler et al. 2019	Hunt	OR	LPC 16:0	0.0582689	0.234504
957	Gängler et al. 2019	Hunt	OR	LPC 16:1	0.364643	0.20185
979	Gängler et al. 2019	Hunt	OR	LPC 18:0	-0.198451	0.222928
992	Gängler et al. 2019	Hunt	OR	LPC 18:1	-0.162519	0.219435
1005	Gängler et al. 2019	Hunt	OR	LPC 18:2	-0.371064	0.200629
1014	Gängler et al. 2019	Hunt	OR	LPC 18:3	-0.0100503	0.17682
1060	Gängler et al. 2019	Hunt	OR	LPC 24:0	-0.462035	0.208212
1118	Gängler et al. 2019	HUNT	OR	Malate	0.10436	0.199586
1123	Gängler et al. 2019	HUNT	OR	Mannose	1.45395	0.233748
1151	Gängler et al. 2019	HUNT	OR	Mystrate	-0.0202027	0.125632
1154	Gängler et al. 2019	HUNT	OR	N-acetylglycine	-0.579818	0.170365
1167	Gängler et al. 2019	HUNT	OR	Octadecanedioate	0.10436	0.160569
1170	Gängler et al. 2019	HUNT	OR	Oleate	0.0198026	0.125809
1176	Gängler et al. 2019	HUNT	OR	Ornithine	0.542324	0.247793
1187	Gängler et al. 2019	HUNT	OR	Palmitate	-0.0100503	0.149562
1214	Gängler et al. 2019	HUNT	OR	PC 32:0	-0.127833	0.249605
1222	Gängler et al. 2019	HUNT	OR	PC 32:1	0.576613	0.175814
1250	Gängler et al. 2019	HUNT	OR	PC 34:0	-0.301105	0.230466
1263	Gängler et al. 2019	HUNT	OR	PC 34:2	-0.116534	0.2753
1301	Gängler et al. 2019	HUNT	OR	PC 36:2	-0.223144	0.263789
1315	Gängler et al. 2019	HUNT	OR	PC 36:4	-0.314711	0.181773
1321	Gängler et al. 2019	HUNT	OR	PC 36:5	-0.198451	0.15922
1363	Gängler et al. 2019	HUNT	OR	PC 38:6	-0.356675	0.212955
1417	Gängler et al. 2019	HUNT	OR	PE 34:1	0.482426	0.157915
1424	Gängler et al. 2019	HUNT	OR	PE 36:1	0.398776	0.143079
1428	Gängler et al. 2019	HUNT	OR	PE 36:2	0.285179	0.149656
1435	Gängler et al. 2019	HUNT	OR	PE 36:4	0.350657	0.16296
1442	Gängler et al. 2019	HUNT	OR	PE 38:4	0.385262	0.169496
1446	Gängler et al. 2019	HUNT	OR	PE 38:5	0.398776	0.152736
1460	Gängler et al. 2019	HUNT	OR	Phenylalanine	1.39377	0.315426
1484	Gängler et al. 2019	HUNT	OR	PI 36:1	0.0676586	0.143206
1514	Gängler et al. 2019	HUNT	OR	Pyruvate	0.476234	0.194577
1523	Gängler et al. 2019	HUNT	OR	Sarcosine	0.0953102	0.163738
1527	Gängler et al. 2019	HUNT	OR	SDMA+ADMA	-0.0304592	0.250734
1573	Gängler et al. 2019	HUNT	OR	SM 34:1	-0.776529	0.267339
1598	Gängler et al. 2019	HUNT	OR	SM 36:1	-0.400478	0.251762
1617	Gängler et al. 2019	HUNT	OR	SM 36:3	-0.634878	0.224581
1643	Gängler et al. 2019	HUNT	OR	SM 40:1	-0.105361	0.214909
1653	Gängler et al. 2019	HUNT	OR	SM 41:1	-0.0100503	0.207727
1660	Gängler et al. 2019	HUNT	OR	SM 41:3	-0.673345	0.251238
1665	Gängler et al. 2019	HUNT	OR	SM 42:1	-0.127833	0.20735
1683	Gängler et al. 2019	HUNT	OR	SM 42:4	-0.891598	0.233748
1692	Gängler et al. 2019	HUNT	OR	Sphinganine	0.451076	0.174535
1699	Gängler et al. 2019	HUNT	OR	Stearidonate	0	0.0940437
1719	Gängler et al. 2019	HUNT	OR	Tetradecanedioate	0.157004	0.146051
1961	Gängler et al. 2019	HUNT	OR	Trimethyllysine	0.398776	0.205463
1967	Gängler et al. 2019	HUNT	OR	Tryptophan	0.81978	0.258397
1983	Gängler et al. 2019	HUNT	OR	Tyrosine	0.824175	0.226353
2013	Gängler et al. 2019	HUNT	OR	Valine	1.1474	0.266865
91	Guasch-Ferre et al. 2019	PREDIMED	HR	Acylcarnitine C10	-0.0202027	0.0959784
104	Guasch-Ferre et al. 2019	PREDIMED	HR	Acylcarnitine C12	-0.116534	0.0906481
115	Guasch-Ferre et al. 2019	PREDIMED	HR	Acylcarnitine C12:1	-0.0618754	0.0890436
132	Guasch-Ferre et al. 2019	PREDIMED	HR	Acylcarnitine C14	-0.0618754	0.094561
143	Guasch-Ferre et al. 2019	PREDIMED	HR	Acylcarnitine C14:1	-0.105361	0.0964454
156	Guasch-Ferre et al. 2019	PREDIMED	HR	Acylcarnitine C14:2	-0.0202027	0.0938073
167	Guasch-Ferre et al. 2019	PREDIMED	HR	Acylcarnitine C16	-0.0304592	0.102356
202	Guasch-Ferre et al. 2019	PREDIMED	HR	Acylcarnitine C18	-0.174353	0.114609
215	Guasch-Ferre et al. 2019	PREDIMED	HR	Acylcarnitine C18:1	-0.0618754	0.1001
225	Guasch-Ferre et al. 2019	PREDIMED	HR	Acylcarnitine C18:1OH	-0.210721	0.105999
230	Guasch-Ferre et al. 2019	PREDIMED	HR	Acylcarnitine C18:2	0.0953102	0.0996274
247	Guasch-Ferre et al. 2019	PREDIMED	HR	Acylcarnitine C2	0.00995033	0.0931055
262	Guasch-Ferre et al. 2019	PREDIMED	HR	Acylcarnitine C20	-0.0725707	0.109042
266	Guasch-Ferre et al. 2019	PREDIMED	HR	Acylcarnitine C20:4	0.122218	0.109894
275	Guasch-Ferre et al. 2019	PREDIMED	HR	Acylcarnitine C3	0.223144	0.130838
295	Guasch-Ferre et al. 2019	PREDIMED	HR	Acylcarnitine C4	-0.0833816	0.102299
309	Guasch-Ferre et al. 2019	PREDIMED	HR	Acylcarnitine C4DC	0.076961	0.10536
314	Guasch-Ferre et al. 2019	PREDIMED	HR	Acylcarnitine C4OH	0.173953	0.11652
320	Guasch-Ferre et al. 2019	PREDIMED	HR	Acylcarnitine C5	0.357674	0.112871
333	Guasch-Ferre et al. 2019	PREDIMED	HR	Acylcarnitine C5:1	0.0487902	0.0944831
340	Guasch-Ferre et al. 2019	PREDIMED	HR	Acylcarnitine C5DC	-0.150823	0.108248
352	Guasch-Ferre et al. 2019	PREDIMED	HR	Acylcarnitine C6	0.0953102	0.101538
369	Guasch-Ferre et al. 2019	PREDIMED	HR	Acylcarnitine C7	-0.0202027	0.1013
376	Guasch-Ferre et al. 2019	PREDIMED	HR	Acylcarnitine C8	0.0582689	0.102456
397	Guasch-Ferre et al. 2019	PREDIMED	HR	Acylcarnitine C9	0.0861777	0.100552
407	Guasch-Ferre et al. 2020	PREDIMED	HR	Alanine	0.223144	0.0751537
556	Guasch-Ferre et al. 2020	PREDIMED	HR	Citrate	0	0.0785272
682	Guasch-Ferre et al. 2020	PREDIMED	HR	Fumarate	0.0198026	0.0748336
848	Guasch-Ferre et al. 2020	PREDIMED	HR	Isocitrate	0.157004	0.0759016
896	Guasch-Ferre et al. 2020	PREDIMED	HR	Lactate	0.231112	0.0827509
1119	Guasch-Ferre et al. 2020	PREDIMED	HR	Malate	0.0392207	0.0684347
1515	Guasch-Ferre et al. 2020	PREDIMED	HR	Pyruvate	0.270027	0.0835261
1702	Guasch-Ferre et al. 2020	PREDIMED	HR	Succinate	0.0676586	0.0754373
92	Gunther et al. 2020	SP2	HR	Acylcarnitine C10	-0.164875	0.0680907
101	Gunther et al. 2020	SP2	HR	Acylcarnitine C10:1	-0.133531	0.0631189
105	Gunther et al. 2020	SP2	HR	Acylcarnitine C12	-0.109815	0.0599155
116	Gunther et al. 2020	SP2	HR	Acylcarnitine C12:1	-0.125563	0.0602861
122	Gunther et al. 2020	SP2	HR	Acylcarnitine C12DC	0.0506931	0.0571414
133	Gunther et al. 2020	SP2	HR	Acylcarnitine C14	-0.0242927	0.0570996
144	Gunther et al. 2020	SP2	HR	Acylcarnitine C14:1	-0.05975	0.058378
150	Gunther et al. 2020	SP2	HR	Acylcarnitine C14:1OH	-0.0439519	0.0582353
157	Gunther et al. 2020	SP2	HR	Acylcarnitine C14:2	-0.105361	0.0599007
161	Gunther et al. 2020	SP2	HR	Acylcarnitine C14OH	0.0506931	0.0571414
168	Gunther et al. 2020	SP2	HR	Acylcarnitine C16	0.0916672	0.0541147
180	Gunther et al. 2020	SP2	HR	Acylcarnitine C16:1	-0.0202027	0.0564003
186	Gunther et al. 2020	SP2	HR	Acylcarnitine C16:1OH	0.0119286	0.0566423
190	Gunther et al. 2020	SP2	HR	Acylcarnitine C16:2	-0.040822	0.0572809
196	Gunther et al. 2020	SP2	HR	Acylcarnitine C16OH	0.162119	0.0528489
203	Gunther et al. 2020	SP2	HR	Acylcarnitine C18	-0.0314907	0.0572776
216	Gunther et al. 2020	SP2	HR	Acylcarnitine C18:1	0.0158733	0.0561382
231	Gunther et al. 2020	SP2	HR	Acylcarnitine C18:2	0.0285875	0.0561485
238	Gunther et al. 2020	SP2	HR	Acylcarnitine C18:2OH	-0.0439519	0.0593085
248	Gunther et al. 2020	SP2	HR	Acylcarnitine C2	0.0401818	0.0562666
263	Gunther et al. 2020	SP2	HR	Acylcarnitine C20	-0.147341	0.0625458
267	Gunther et al. 2020	SP2	HR	Acylcarnitine C20:4	0.0592119	0.0556874
276	Gunther et al. 2020	SP2	HR	Acylcarnitine C3	0.0487902	0.0557832
290	Gunther et al. 2020	SP2	HR	Acylcarnitine C3DC	0.0207825	0.0563656
296	Gunther et al. 2020	SP2	HR	Acylcarnitine C4	0.136278	0.050699
310	Gunther et al. 2020	SP2	HR	Acylcarnitine C4DC	0.10616	0.0565652
334	Gunther et al. 2020	SP2	HR	Acylcarnitine C5:1	0.0889262	0.0554625
341	Gunther et al. 2020	SP2	HR	Acylcarnitine C5DC	0.0695261	0.0532002
346	Gunther et al. 2020	SP2	HR	Acylcarnitine C5OH	0.0207825	0.0563656
353	Gunther et al. 2020	SP2	HR	Acylcarnitine C6	0.0411419	0.0547346
361	Gunther et al. 2020	SP2	HR	Acylcarnitine C6DC	-0.140412	0.0618524
371	Gunther et al. 2020	SP2	HR	Acylcarnitine C7DC	-0.136966	0.0589519
377	Gunther et al. 2020	SP2	HR	Acylcarnitine C8	-0.150823	0.0665395
389	Gunther et al. 2020	SP2	HR	Acylcarnitine C8:1	0.116894	0.0498237
393	Gunther et al. 2020	SP2	HR	Acylcarnitine C8OH	-0.140412	0.0618524
408	Gunther et al. 2020	SP2	HR	Alanine	0.319907	0.0551016
439	Gunther et al. 2020	SP2	HR	Arginine	-0.118784	0.0587881
560	Gunther et al. 2020	SP2	HR	Citrulline	-0.0954102	0.0599374
694	Gunther et al. 2020	SP2	HR	Glutamate	0.351361	0.0528696
713	Gunther et al. 2020	SP2	HR	Glutamine	0.351361	0.0528696
747	Gunther et al. 2020	SP2	HR	Glycine	-0.34249	0.0677814
807	Gunther et al. 2020	SP2	HR	Histidine	-0.065072	0.058142
855	Gunther et al. 2020	SP2	HR	Isoleucine	0.410121	0.0564322
914	Gunther et al. 2020	SP2	HR	Leucine	0.410121	0.0564322
1128	Gunther et al. 2020	SP2	HR	Methionine	0.0732505	0.0589402
1177	Gunther et al. 2020	SP2	HR	Ornithine	0.178983	0.0563998
1461	Gunther et al. 2020	SP2	HR	Phenylalanine	0.237441	0.0532344
1502	Gunther et al. 2020	SP2	HR	Proline	0.166362	0.0556202
1537	Gunther et al. 2020	SP2	HR	Serine	-0.177931	0.0614227
1984	Gunther et al. 2020	SP2	HR	Tyrosine	0.291176	0.0523217
2014	Gunther et al. 2020	SP2	HR	Valine	0.349952	0.0545524
483	Hang et al. 2020	NHS	HR	Carnitine	0.223144	0.117634
618	Hang et al. 2020	NHS	HR	DG 34:1	0.708036	0.121884
625	Hang et al. 2020	NHS	HR	DG 34:2	0.587787	0.119005
629	Hang et al. 2020	NHS	HR	DG 34:3	0.604316	0.13856
635	Hang et al. 2020	NHS	HR	DG 36:2	0.593327	0.120122
641	Hang et al. 2020	NHS	HR	DG 36:3	0.307485	0.111051
1769	Hang et al. 2020	NHS	HR	TG 50:2	0.722706	0.128713
1777	Hang et al. 2020	NHS	HR	TG 50:3	0.542324	0.130696
1784	Hang et al. 2020	NHS	HR	TG 50:4	0.329304	0.122229
1789	Hang et al. 2020	NHS	HR	TG 50:5	0.322083	0.115513
1793	Hang et al. 2020	NHS	HR	TG 50:6	0.300105	0.108838
1811	Hang et al. 2020	NHS	HR	TG 52:2	0.688135	0.137918
1817	Hang et al. 2020	NHS	HR	TG 52:3	0.378436	0.126253
1830	Hang et al. 2020	NHS	HR	TG 52:6	0.14842	0.1133
1834	Hang et al. 2020	NHS	HR	TG 52:7	0.157004	0.107872
1881	Hang et al. 2020	NHS	HR	TG 54:8	-0.0100503	0.107652
1884	Hang et al. 2020	NHS	HR	TG 54:9	-0.105361	0.109194
1889	Hang et al. 2020	NHS	HR	TG 56:10	-0.139262	0.107003
1917	Hang et al. 2020	NHS	HR	TG 56:9	-0.116534	0.111684
3	Liu et al. 2017	ERF	OR	1,5-anhydrosorbitol	0.392042	0.109042
18	Liu et al. 2017	ERF	OR	2-hydroxybutyrate	0.71295	0.1136
41	Liu et al. 2017	ERF	OR	3-hydroxybutyrate	0.71295	0.1136
46	Liu et al. 2017	ERF	OR	3-hydroxyisobutyrate	0.506818	0.0915385
60	Liu et al. 2017	ERF	OR	3-methyl-2-oxobutyrate	0.688135	0.108145
409	Liu et al. 2017	ERF	OR	Alanine	0.598837	0.105723
429	Liu et al. 2017	ERF	OR	Oxoglutarate	0.565314	0.113487
729	Liu et al. 2017	ERF	OR	Glycerol	0.512824	0.117732
856	Liu et al. 2017	ERF	OR	Isoleucine	0.667829	0.115154
897	Liu et al. 2017	ERF	OR	Lactate	0.371564	0.0890996
915	Liu et al. 2017	ERF	OR	Leucine	0.652325	0.114246
1107	Liu et al. 2017	ERF	OR	Lysine	0.157004	0.115795
1129	Liu et al. 2017	ERF	OR	Methionine	0.277632	0.103435
1256	Liu et al. 2017	ERF	OR	PC 34:1	-0.462035	0.116688
1264	Liu et al. 2017	ERF	OR	PC 34:2	-0.139262	0.108246
1272	Liu et al. 2017	ERF	OR	PC 34:3	-0.527633	0.121279
1302	Liu et al. 2017	ERF	OR	PC 36:2	-0.430783	0.121144
1462	Liu et al. 2017	ERF	OR	Phenylalanine	0.559616	0.109984
1516	Liu et al. 2017	ERF	OR	Pyruvate	0.425268	0.0911877
1729	Liu et al. 2017	ERF	OR	TG 48:0	0.444686	0.0907937
1734	Liu et al. 2017	ERF	OR	TG 48:1	0.431782	0.0967037
1756	Liu et al. 2017	ERF	OR	TG 50:0	0.470004	0.108615
1763	Liu et al. 2017	ERF	OR	TG 50:1	0.647103	0.118637
1770	Liu et al. 2017	ERF	OR	TG 50:2	0.553885	0.115969
1790	Liu et al. 2017	ERF	OR	TG 50:5	0.378436	0.0834727
1807	Liu et al. 2017	ERF	OR	TG 52:1	0.565314	0.113487
1812	Liu et al. 2017	ERF	OR	TG 52:2	0.565314	0.119899
1818	Liu et al. 2017	ERF	OR	TG 52:3	0.476234	0.115662
1831	Liu et al. 2017	ERF	OR	TG 52:6	0.482426	0.105999
1843	Liu et al. 2017	ERF	OR	TG 54:1	0.425268	0.0815947
1847	Liu et al. 2017	ERF	OR	TG 54:2	0.438255	0.114178
1876	Liu et al. 2017	ERF	OR	TG 54:7	0.438255	0.0852778
1909	Liu et al. 2017	ERF	OR	TG 56:7	0.506818	0.112168
1913	Liu et al. 2017	ERF	OR	TG 56:8	0.482426	0.0906131
1920	Liu et al. 2017	ERF	OR	TG 58:10	0.34359	0.0885993
1985	Liu et al. 2017	ERF	OR	Tyrosine	0.688135	0.111237
2015	Liu et al. 2017	ERF	OR	Valine	0.746688	0.114753
695	Liu et al. 2019	PREDIMED	HR	Glutamate	0.779736	0.0742369
714	Liu et al. 2019	PREDIMED	HR	Glutamine	-0.2488	0.0946684
33	Lotta et al. 2016	EPIC-Norfolk	HR	3-hydroxy-2-ethylpropionate	0.336472	0.0760101
47	Lotta et al. 2016	EPIC-Norfolk	HR	3-hydroxyisobutyrate	0.277632	0.0789706
61	Lotta et al. 2016	EPIC-Norfolk	HR	3-methyl-2-oxobutyrate	0.470004	0.0936598
66	Lotta et al. 2016	EPIC-Norfolk	HR	3-methyl-2-oxovalerate	0.482426	0.0938073
73	Lotta et al. 2016	EPIC-Norfolk	HR	4-methyl-2-oxopentanoate	0.385262	0.091403
277	Lotta et al. 2016	EPIC-Norfolk	HR	Acylcarnitine C3	0.139762	0.0798144
297	Lotta et al. 2016	EPIC-Norfolk	HR	Acylcarnitine C4	-0.198451	0.0805747
321	Lotta et al. 2016	EPIC-Norfolk	HR	Acylcarnitine C5	0.122218	0.0785946
422	Lotta et al. 2016	EPIC-Norfolk	HR	2-hydroxyisocaproate	0.198851	0.0872461
425	Lotta et al. 2016	EPIC-Norfolk	HR	2-hydroxy-3-methylbutyrate	0.198851	0.075204
469	Lotta et al. 2016	EPIC-Norfolk	HR	3-hydroxyisovalerate	0.215111	0.0799221
857	Lotta et al. 2016	EPIC-Norfolk	HR	Isoleucine	0.270027	0.0835261
916	Lotta et al. 2016	EPIC-Norfolk	HR	Leucine	0.198851	0.083703
2016	Lotta et al. 2016	EPIC-Norfolk	HR	Valine	0.29267	0.0925779
88	Lu et al. 2016	SCHS	OR	Acetoacetate	0.24686	0.132903
128	Lu et al. 2016	SCHS	OR	Acylcarnitine C13	-0.248461	0.148966
322	Lu et al. 2016	SCHS	OR	Acylcarnitine C5	-0.314711	0.161959
378	Lu et al. 2016	SCHS	OR	Acylcarnitine C8	-0.235722	0.144605
440	Lu et al. 2016	SCHS	OR	Arginine	-0.274437	0.150938
484	Lu et al. 2016	SCHS	OR	Carnitine	0.262364	0.132345
495	Lu et al. 2016	SCHS	OR	Caffeine	0.14842	0.148966
570	Lu et al. 2016	SCHS	OR	3-carboxy-4-methyl-5-propyl-2-furanpropionate	-0.274437	0.132036
685	Lu et al. 2016	SCHS	OR	Gluconate	0.322083	0.135081
730	Lu et al. 2016	SCHS	OR	Glycerol	-0.733969	0.191834
748	Lu et al. 2016	SCHS	OR	Glycine	0.978326	0.222839
792	Lu et al. 2016	SCHS	OR	Hippurate	0.277632	0.131809
858	Lu et al. 2016	SCHS	OR	Isoleucine	0.364643	0.150475
885	Lu et al. 2016	SCHS	OR	Linoleate	0.364643	0.18429
898	Lu et al. 2016	SCHS	OR	Lactate	0.350657	0.152631
917	Lu et al. 2016	SCHS	OR	Leucine	0.364643	0.150475
967	Lu et al. 2016	SCHS	OR	LPC 17:0	-0.174353	0.146774
980	Lu et al. 2016	SCHS	OR	LPC 18:0	-0.400478	0.139422
1006	Lu et al. 2016	SCHS	OR	LPC 18:2	-0.261365	0.155841
1047	Lu et al. 2016	SCHS	OR	LPC 20:5	-0.210721	0.152294
1103	Lu et al. 2016	SCHS	OR	LPI 16:1	0.693147	0.173205
1171	Lu et al. 2016	SCHS	OR	Oleate	0.741937	0.165674
1178	Lu et al. 2016	SCHS	OR	Ornithine	-0.462035	0.17109
1188	Lu et al. 2016	SCHS	OR	Palmitate	0.41211	0.138606
1517	Lu et al. 2016	SCHS	OR	Pyruvate	0.350657	0.175557
1538	Lu et al. 2016	SCHS	OR	Serine	-0.385662	0.171452
1697	Lu et al. 2016	SCHS	OR	Stearate	0.71295	0.163557
1942	Lu et al. 2016	SCHS	OR	Threonine	0.425268	0.141499
1997	Lu et al. 2016	SCHS	OR	Urea	0.678034	0.174075
2017	Lu et al. 2016	SCHS	OR	Valine	0.506818	0.159374
81	Lu et al. 2018	SCHS	OR	Arachidonate	0.425268	0.172099
93	Lu et al. 2018	SCHS	OR	Acylcarnitine C10	0.157004	0.14441
106	Lu et al. 2018	SCHS	OR	Acylcarnitine C12	0.239017	0.142759
117	Lu et al. 2018	SCHS	OR	Acylcarnitine C12:1	0.14842	0.134858
124	Lu et al. 2018	SCHS	OR	Acylcarnitine C12OH	0.322083	0.142759
134	Lu et al. 2018	SCHS	OR	Acylcarnitine C14	0.300105	0.145986
145	Lu et al. 2018	SCHS	OR	Acylcarnitine C14:1	0.182322	0.140749
162	Lu et al. 2018	SCHS	OR	Acylcarnitine C14OH	0.239017	0.144273
169	Lu et al. 2018	SCHS	OR	Acylcarnitine C16	0.207014	0.170959
181	Lu et al. 2018	SCHS	OR	Acylcarnitine C16:1	0.182322	0.140749
187	Lu et al. 2018	SCHS	OR	Acylcarnitine C16:1OH	0.131028	0.130892
191	Lu et al. 2018	SCHS	OR	Acylcarnitine C16:2	0.14842	0.141097
197	Lu et al. 2018	SCHS	OR	Acylcarnitine C16OH	0.19062	0.145547
204	Lu et al. 2018	SCHS	OR	Acylcarnitine C18	0.0198026	0.160819
217	Lu et al. 2018	SCHS	OR	Acylcarnitine C18:1	0.0582689	0.154626
226	Lu et al. 2018	SCHS	OR	Acylcarnitine C18:1OH	0.223144	0.140834
232	Lu et al. 2018	SCHS	OR	Acylcarnitine C18:2	0.0295588	0.162842
239	Lu et al. 2018	SCHS	OR	Acylcarnitine C18:2OH	0.182322	0.140749
241	Lu et al. 2018	SCHS	OR	Acylcarnitine C18OH	-0.0304592	0.158194
249	Lu et al. 2018	SCHS	OR	Acylcarnitine C2	0.0861777	0.127294
278	Lu et al. 2018	SCHS	OR	Acylcarnitine C3	0.0392207	0.166409
298	Lu et al. 2018	SCHS	OR	Acylcarnitine C4	0.122218	0.168826
315	Lu et al. 2018	SCHS	OR	Acylcarnitine C4OH	0.131028	0.137255
347	Lu et al. 2018	SCHS	OR	Acylcarnitine C5OH	-0.0618754	0.128911
354	Lu et al. 2018	SCHS	OR	Acylcarnitine C6	0.157004	0.139877
366	Lu et al. 2018	SCHS	OR	Acylcarnitine C6OH	0.131028	0.134339
394	Lu et al. 2018	SCHS	OR	Acylcarnitine C8OH	0.207014	0.143151
398	Lu et al. 2018	SCHS	OR	Adrenate	0.425268	0.163859
655	Lu et al. 2018	SCHS	OR	Docosahexaenoate	0.198851	0.147127
660	Lu et al. 2018	SCHS	OR	Dihomo-gamma-linolenate	0.620576	0.168109
671	Lu et al. 2018	SCHS	OR	Eicosapentaenoate	0.0953102	0.152354
903	Lu et al. 2018	SCHS	OR	Laurate	0.139762	0.145289
931	Lu et al. 2018	SCHS	OR	Linolenate	0.2742	0.1134
1148	Lu et al. 2018	SCHS	OR	Myo-inositol	-0.314711	0.184218
1152	Lu et al. 2018	SCHS	OR	Mystrate	0.542324	0.163201
1190	Lu et al. 2018	SCHS	OR	Palmitooleate	0.364643	0.146777
410	Lu et al. 2019a	SCHS	OR	Alanine	0.157004	0.148966
451	Lu et al. 2019a	SCHS	OR	Asparagine	-0.0100503	0.164111
459	Lu et al. 2019a	SCHS	OR	Aspartate	0.231112	0.183969
696	Lu et al. 2019a	SCHS	OR	Glutamate	0.270027	0.163031
715	Lu et al. 2019a	SCHS	OR	Glutamine	-0.400478	0.291209
808	Lu et al. 2019a	SCHS	OR	Histidine	-0.174353	0.157601
1108	Lu et al. 2019a	SCHS	OR	Lysine	0.182322	0.139129
1130	Lu et al. 2019a	SCHS	OR	Methionine	0.207014	0.147469
1463	Lu et al. 2019a	SCHS	OR	Phenylalanine	0.173953	0.141948
1968	Lu et al. 2019a	SCHS	OR	Tryptophan	0.482426	0.193503
1986	Lu et al. 2019a	SCHS	OR	Tyrosine	0.300105	0.152764
1104	Lu et al. 2019b	Jiading Cohort	OR	LPI 16:1	0.536493	0.197918
1105	Lu et al. 2019b	REACTION	OR	LPI 16:1	0.223144	0.0892821
1273	Lu et al. 2019b	Jiading Cohort	OR	PC 34:3	0.536493	0.197914
1274	Lu et al. 2019b	REACTION	OR	PC 34:3	0.223144	0.090987
1735	Lu et al. 2019b	Jiading Cohort	OR	TG 48:1	0.59923	0.112262
1736	Lu et al. 2019b	REACTION	OR	TG 48:1	0.238854	0.0496177
1741	Lu et al. 2019b	Jiading Cohort	OR	TG 48:2	0.560703	0.132968
1742	Lu et al. 2019b	REACTION	OR	TG 48:2	0.256902	0.0610855
1747	Lu et al. 2019b	Jiading Cohort	OR	TG 48:3	0.71784	0.19809
1748	Lu et al. 2019b	REACTION	OR	TG 48:3	0.207014	0.0882743
1757	Lu et al. 2019b	Jiading Cohort	OR	TG 50:0	0.548121	0.190499
1758	Lu et al. 2019b	REACTION	OR	TG 50:0	0.239017	0.0861736
1764	Lu et al. 2019b	Jiading Cohort	OR	TG 50:1	0.560696	0.108866
1765	Lu et al. 2019b	REACTION	OR	TG 50:1	0.270027	0.0500581
1771	Lu et al. 2019b	Jiading Cohort	OR	TG 50:2	0.614247	0.0950012
1772	Lu et al. 2019b	REACTION	OR	TG 50:2	0.271662	0.0445797
1778	Lu et al. 2019b	Jiading Cohort	OR	TG 50:3	0.781236	0.123204
1779	Lu et al. 2019b	REACTION	OR	TG 50:3	0.245184	0.0512066
1794	Lu et al. 2019b	Jiading Cohort	OR	TG 51:0	0.512824	0.182259
1795	Lu et al. 2019b	REACTION	OR	TG 51:0	0.300105	0.0887193
1800	Lu et al. 2019b	Jiading Cohort	OR	TG 51:2	0.625938	0.192285
1801	Lu et al. 2019b	REACTION	OR	TG 51:2	0.254642	0.0888521
1804	Lu et al. 2019b	Jiading Cohort	OR	TG 51:3	0.57098	0.187066
1805	Lu et al. 2019b	REACTION	OR	TG 51:3	0.285179	0.0893874
1836	Lu et al. 2019b	Jiading Cohort	OR	TG 53:2	0.625938	0.200027
1837	Lu et al. 2019b	REACTION	OR	TG 53:2	0.262364	0.0914545
1839	Lu et al. 2019b	Jiading Cohort	OR	TG 53:3	0.615186	0.190403
1840	Lu et al. 2019b	REACTION	OR	TG 53:3	0.223144	0.0875626
1852	Lu et al. 2019b	Jiading Cohort	OR	TG 54:3	0.548121	0.184154
1853	Lu et al. 2019b	REACTION	OR	TG 54:3	0.231112	0.0885689
1858	Lu et al. 2019b	Jiading Cohort	OR	TG 54:4	0.640963	0.137902
1859	Lu et al. 2019b	REACTION	OR	TG 54:4	0.246606	0.0647337
1864	Lu et al. 2019b	Jiading Cohort	OR	TG 54:5	0.654912	0.139158
1865	Lu et al. 2019b	REACTION	OR	TG 54:5	0.295717	0.067352
1870	Lu et al. 2019b	Jiading Cohort	OR	TG 54:6	0.559616	0.197571
1871	Lu et al. 2019b	REACTION	OR	TG 54:6	0.239017	0.0936205
1877	Lu et al. 2019b	Jiading Cohort	OR	TG 54:7	0.590453	0.138711
1878	Lu et al. 2019b	REACTION	OR	TG 54:7	0.329845	0.0678013
1886	Lu et al. 2019b	Jiading Cohort	OR	TG 55:6	0.65752	0.201133
1887	Lu et al. 2019b	REACTION	OR	TG 55:6	0.285179	0.0916754
1899	Lu et al. 2019b	Jiading Cohort	OR	TG 56:5	0.58097	0.136068
1900	Lu et al. 2019b	REACTION	OR	TG 56:5	0.265594	0.0652184
1903	Lu et al. 2019b	Jiading Cohort	OR	TG 56:6	0.625938	0.20595
1904	Lu et al. 2019b	REACTION	OR	TG 56:6	0.285179	0.0955832
656	Mahendran et al. 2013a	METSIM	OR	Docosahexaenoate	-0.150823	0.0973753
731	Mahendran et al. 2013a	METSIM	OR	Glycerol	0.165514	0.025965
886	Mahendran et al. 2013a	METSIM	OR	Linoleate	-0.0833816	0.016643
42	Mahendran et al. 2013b	METSIM	OR	3-hydroxybutyrate	0.0295588	0.145115
89	Mahendran et al. 2013b	METSIM	OR	Acetoacetate	0.277632	0.141297
499	Mamtani et al. 2016	SAFHS	HR	Cer d18:0/16:0	0.2925	0.0565306
501	Mamtani et al. 2016	SAFHS	HR	Cer d18:0/18:0	0.515	0.0612755
503	Mamtani et al. 2016	SAFHS	HR	Cer d18:0/20:0	0.3135	0.0605612
505	Mamtani et al. 2016	SAFHS	HR	Cer d18:0/22:0	0.459	0.0607143
507	Mamtani et al. 2016	SAFHS	HR	Cer d18:0/24:0	0.3796	0.0581122
509	Mamtani et al. 2016	SAFHS	HR	Cer d18:0/24:1	0.3924	0.0596429
513	Mamtani et al. 2016	SAFHS	HR	Cer d18:1/16:0	0.3071	0.0672959
516	Mamtani et al. 2016	SAFHS	HR	Cer d18:1/18:0	0.4593	0.067449
520	Mamtani et al. 2016	SAFHS	HR	Cer d18:1/20:0	0.3578	0.0658163
525	Mamtani et al. 2016	SAFHS	HR	Cer d18:1/22:0	0.4033	0.0696429
531	Mamtani et al. 2016	SAFHS	HR	Cer d18:1/24:0	0.2047	0.0695408
535	Mamtani et al. 2016	SAFHS	HR	Cer d18:1/24:1	0.2554	0.0647449
605	Mamtani et al. 2016	SAFHS	HR	DG 30:0	0.2283	0.0732129
608	Mamtani et al. 2016	SAFHS	HR	DG 32:0	0.4423	0.0806107
610	Mamtani et al. 2016	SAFHS	HR	DG 32:1	0.1537	0.0771415
613	Mamtani et al. 2016	SAFHS	HR	DG 32:2	0.1399	0.0750497
616	Mamtani et al. 2016	SAFHS	HR	DG 34:0	0.5139	0.0828556
619	Mamtani et al. 2016	SAFHS	HR	DG 34:1	0.357506	0.154471
626	Mamtani et al. 2016	SAFHS	HR	DG 34:2	0.205405	0.154826
631	Mamtani et al. 2016	SAFHS	HR	DG 36:1	0.4321	0.0919882
636	Mamtani et al. 2016	SAFHS	HR	DG 36:2	0.2784	0.0625162
642	Mamtani et al. 2016	SAFHS	HR	DG 36:3	0.194126	0.130197
645	Mamtani et al. 2016	SAFHS	HR	DG 36:4	0.146667	0.119188
647	Mamtani et al. 2016	SAFHS	HR	DG 38:4	0.271808	0.054034
649	Mamtani et al. 2016	SAFHS	HR	DG 38:5	0.205287	0.0539037
768	Mamtani et al. 2016	SAFHS	HR	Hex2Cer d18:1/24:0	0.2716	0.057551
770	Mamtani et al. 2016	SAFHS	HR	Hex2Cer d18:1/24:1	0.0392	0.0568878
773	Mamtani et al. 2016	SAFHS	HR	HexCer d18:1/16:0	0.2835	0.0571939
776	Mamtani et al. 2016	SAFHS	HR	HexCer d18:1/18:0	0.078	0.0557653
778	Mamtani et al. 2016	SAFHS	HR	HexCer d18:1/20:0	0.1356	0.0577551
781	Mamtani et al. 2016	SAFHS	HR	HexCer d18:1/22:0	0.1219	0.0571939
784	Mamtani et al. 2016	SAFHS	HR	HexCer d18:1/24:0	0.0797	0.0591327
787	Mamtani et al. 2016	SAFHS	HR	HexCer d18:1/24:1	0.0551	0.0567347
936	Mamtani et al. 2016	SAFHS	HR	LPC 14:0	0.0478	0.0561724
941	Mamtani et al. 2016	SAFHS	HR	LPC 15:0	-0.0767	0.052448
947	Mamtani et al. 2016	SAFHS	HR	LPC 16:0	-0.0346	0.0536215
958	Mamtani et al. 2016	SAFHS	HR	LPC 16:1	-0.1276	0.0546929
968	Mamtani et al. 2016	SAFHS	HR	LPC 17:0	-0.1486	0.0528562
973	Mamtani et al. 2016	SAFHS	HR	LPC 17:1	-0.2168	0.0540296
981	Mamtani et al. 2016	SAFHS	HR	LPC 18:0	-0.0798	0.0538255
993	Mamtani et al. 2016	SAFHS	HR	LPC 18:1	-0.2302	0.0545908
1007	Mamtani et al. 2016	SAFHS	HR	LPC 18:2	-0.1367	0.0607642
1015	Mamtani et al. 2016	SAFHS	HR	LPC 18:3	-0.1158	0.0575499
1020	Mamtani et al. 2016	SAFHS	HR	LPC 20:0	-0.307548	0.0407461
1023	Mamtani et al. 2016	SAFHS	HR	LPC 20:1	-0.2732	0.0567847
1027	Mamtani et al. 2016	SAFHS	HR	LPC 20:2	-0.1635	0.0531113
1033	Mamtani et al. 2016	SAFHS	HR	LPC 20:3	0.085	0.0571418
1040	Mamtani et al. 2016	SAFHS	HR	LPC 20:4	-0.0712	0.0543867
1048	Mamtani et al. 2016	SAFHS	HR	LPC 20:5	-0.06	0.0568357
1055	Mamtani et al. 2016	SAFHS	HR	LPC 22:6	-0.1372	0.0526011
1061	Mamtani et al. 2016	SAFHS	HR	LPC 24:0	-0.11262	0.0398856
1066	Mamtani et al. 2016	SAFHS	HR	LPE 16:0	-0.0359	0.0560705
1075	Mamtani et al. 2016	SAFHS	HR	LPE 18:0	-0.0635	0.0588255
1081	Mamtani et al. 2016	SAFHS	HR	LPE 18:1	-0.0541	0.0564274
1088	Mamtani et al. 2016	SAFHS	HR	LPE 18:2	-0.0152999	0.0556112
1095	Mamtani et al. 2016	SAFHS	HR	LPE 20:4	0.0135	0.052703
1100	Mamtani et al. 2016	SAFHS	HR	LPE 22:6	0.041	0.0518869
1204	Mamtani et al. 2016	SAFHS	HR	PC 30:0	0.0580789	0.0407469
1215	Mamtani et al. 2016	SAFHS	HR	PC 32:0	0.0974424	0.0388149
1223	Mamtani et al. 2016	SAFHS	HR	PC 32:1	0.0228963	0.0426925
1230	Mamtani et al. 2016	SAFHS	HR	PC 32:2	0.0676841	0.0422905
1235	Mamtani et al. 2016	SAFHS	HR	PC 32:3	-0.1727	0.0634682
1238	Mamtani et al. 2016	SAFHS	HR	PC 33:1	0.1073	0.0531623
1242	Mamtani et al. 2016	SAFHS	HR	PC 33:2	0.1392	0.0573969
1245	Mamtani et al. 2016	SAFHS	HR	PC 33:3	-0.0209	0.0599989
1251	Mamtani et al. 2016	SAFHS	HR	PC 34:0	0.113485	0.0393104
1257	Mamtani et al. 2016	SAFHS	HR	PC 34:1	0.00394073	0.0405723
1265	Mamtani et al. 2016	SAFHS	HR	PC 34:2	0.0729295	0.0372308
1275	Mamtani et al. 2016	SAFHS	HR	PC 34:3	-0.0253	0.0671927
1280	Mamtani et al. 2016	SAFHS	HR	PC 34:4	-0.0676456	0.0422901
1285	Mamtani et al. 2016	SAFHS	HR	PC 35:2	-0.0258	0.0534684
1289	Mamtani et al. 2016	SAFHS	HR	PC 36:0	0.0727	0.0538766
1294	Mamtani et al. 2016	SAFHS	HR	PC 36:1	-0.00240218	0.0417643
1303	Mamtani et al. 2016	SAFHS	HR	PC 36:2	0.00220147	0.039042
1309	Mamtani et al. 2016	SAFHS	HR	PC 36:3	0.108538	0.0390292
1316	Mamtani et al. 2016	SAFHS	HR	PC 36:4	0.0649511	0.0314059
1322	Mamtani et al. 2016	SAFHS	HR	PC 36:5	0.0447574	0.0415493
1325	Mamtani et al. 2016	SAFHS	HR	PC 36:6	-0.0212	0.0646927
1329	Mamtani et al. 2016	SAFHS	HR	PC 37:4	-0.0572	0.0518358
1337	Mamtani et al. 2016	SAFHS	HR	PC 38:2	0.0492	0.060152
1345	Mamtani et al. 2016	SAFHS	HR	PC 38:3	0.2412	0.0614785
1351	Mamtani et al. 2016	SAFHS	HR	PC 38:4	-0.0417036	0.038848
1356	Mamtani et al. 2016	SAFHS	HR	PC 38:5	-0.102672	0.0382585
1364	Mamtani et al. 2016	SAFHS	HR	PC 38:6	0.0375643	0.039528
1369	Mamtani et al. 2016	SAFHS	HR	PC 39:6	-0.1076	0.0533153
1381	Mamtani et al. 2016	SAFHS	HR	PC 40:5	0.00349997	0.0588254
1386	Mamtani et al. 2016	SAFHS	HR	PC 40:6	0.0148	0.0554582
1391	Mamtani et al. 2016	SAFHS	HR	PC 40:7	-0.11457	0.037167
1418	Mamtani et al. 2016	SAFHS	HR	PE 34:1	0.227825	0.0417246
1420	Mamtani et al. 2016	SAFHS	HR	PE 34:2	0.134009	0.0397492
1422	Mamtani et al. 2016	SAFHS	HR	PE 34:3	0.178983	0.0602643
1425	Mamtani et al. 2016	SAFHS	HR	PE 36:1	0.494696	0.0715917
1429	Mamtani et al. 2016	SAFHS	HR	PE 36:2	0.183911	0.0418775
1432	Mamtani et al. 2016	SAFHS	HR	PE 36:3	0.129284	0.0389455
1436	Mamtani et al. 2016	SAFHS	HR	PE 36:4	0.17847	0.0406289
1439	Mamtani et al. 2016	SAFHS	HR	PE 36:5	0.0659862	0.0405408
1443	Mamtani et al. 2016	SAFHS	HR	PE 38:4	0.16953	0.0429314
1447	Mamtani et al. 2016	SAFHS	HR	PE 38:5	0.112296	0.0394934
1450	Mamtani et al. 2016	SAFHS	HR	PE 38:6	0.21964	0.0412458
1452	Mamtani et al. 2016	SAFHS	HR	PE 40:6	0.17838	0.0432863
1479	Mamtani et al. 2016	SAFHS	HR	PI 34:0	0.2258	0.060305
1482	Mamtani et al. 2016	SAFHS	HR	PI 34:1	0.2798	0.0617846
1485	Mamtani et al. 2016	SAFHS	HR	PI 36:1	0.1174	0.0595397
1487	Mamtani et al. 2016	SAFHS	HR	PI 36:2	0.0597	0.0605601
1489	Mamtani et al. 2016	SAFHS	HR	PI 36:3	0.0481	0.0606111
1491	Mamtani et al. 2016	SAFHS	HR	PI 36:4	0.1363	0.0663763
1493	Mamtani et al. 2016	SAFHS	HR	PI 38:3	0.1054	0.0625499
1496	Mamtani et al. 2016	SAFHS	HR	PI 38:4	-0.1039	0.0660702
1498	Mamtani et al. 2016	SAFHS	HR	PI 38:5	-0.1997	0.0597948
1556	Mamtani et al. 2016	SAFHS	HR	SM 32:1	0.2224	0.0646939
1562	Mamtani et al. 2016	SAFHS	HR	SM 32:2	-0.2822	0.0793367
1564	Mamtani et al. 2016	SAFHS	HR	SM 33:1	0.1787	0.0622449
1574	Mamtani et al. 2016	SAFHS	HR	SM 34:1	0.0887	0.0671939
1585	Mamtani et al. 2016	SAFHS	HR	SM 34:2	-0.1012	0.0756122
1590	Mamtani et al. 2016	SAFHS	HR	SM 35:1	0.0899	0.0610204
1599	Mamtani et al. 2016	SAFHS	HR	SM 36:1	0.2505	0.0651531
1610	Mamtani et al. 2016	SAFHS	HR	SM 36:2	-0.0481	0.0666327
1618	Mamtani et al. 2016	SAFHS	HR	SM 36:3	-0.2156	0.0632143
1626	Mamtani et al. 2016	SAFHS	HR	SM 38:1	0.2419	0.0571939
1632	Mamtani et al. 2016	SAFHS	HR	SM 38:2	-0.23	0.0579592
1636	Mamtani et al. 2016	SAFHS	HR	SM 39:1	0.091	0.0556633
1654	Mamtani et al. 2016	SAFHS	HR	SM 41:1	0.2643	0.0652041
1658	Mamtani et al. 2016	SAFHS	HR	SM 41:2	-0.0234	0.0622959
1666	Mamtani et al. 2016	SAFHS	HR	SM 42:1	0.1922	0.0662755
1730	Mamtani et al. 2016	SAFHS	HR	TG 48:0	0.524	0.0718355
1737	Mamtani et al. 2016	SAFHS	HR	TG 48:1	0.3484	0.0758659
1743	Mamtani et al. 2016	SAFHS	HR	TG 48:2	0.173438	0.0363798
1749	Mamtani et al. 2016	SAFHS	HR	TG 48:3	0.000572936	0.0512282
1754	Mamtani et al. 2016	SAFHS	HR	TG 49:2	0.343599	0.0429896
1759	Mamtani et al. 2016	SAFHS	HR	TG 50:0	0.5949	0.0775496
1766	Mamtani et al. 2016	SAFHS	HR	TG 50:1	0.499549	0.0565258
1773	Mamtani et al. 2016	SAFHS	HR	TG 50:2	0.389035	0.0456264
1780	Mamtani et al. 2016	SAFHS	HR	TG 50:3	0.0144154	0.0438112
1785	Mamtani et al. 2016	SAFHS	HR	TG 50:4	-0.0608	0.0680089
1796	Mamtani et al. 2016	SAFHS	HR	TG 51:0	0.3123	0.065509
1798	Mamtani et al. 2016	SAFHS	HR	TG 51:1	0.5106	0.0791313
1802	Mamtani et al. 2016	SAFHS	HR	TG 51:2	0.200607	0.0441067
1808	Mamtani et al. 2016	SAFHS	HR	TG 52:1	0.7186	0.0870392
1813	Mamtani et al. 2016	SAFHS	HR	TG 52:2	0.4679	0.089233
1819	Mamtani et al. 2016	SAFHS	HR	TG 52:3	0.0902781	0.053388
1823	Mamtani et al. 2016	SAFHS	HR	TG 52:4	-0.0519452	0.0488871
1841	Mamtani et al. 2016	SAFHS	HR	TG 53:3	-0.0353	0.0692333
1844	Mamtani et al. 2016	SAFHS	HR	TG 54:1	0.4151	0.0761721
1848	Mamtani et al. 2016	SAFHS	HR	TG 54:2	0.542	0.0830597
1854	Mamtani et al. 2016	SAFHS	HR	TG 54:3	0.1784	0.0721416
1860	Mamtani et al. 2016	SAFHS	HR	TG 54:4	0.0473883	0.0431651
1866	Mamtani et al. 2016	SAFHS	HR	TG 54:5	-0.001	0.0648967
1872	Mamtani et al. 2016	SAFHS	HR	TG 54:6	-0.0927	0.0584682
1905	Mamtani et al. 2016	SAFHS	HR	TG 56:6	0.2339	0.0685191
1914	Mamtani et al. 2016	SAFHS	HR	TG 56:8	-0.0995001	0.0566825
1930	Mamtani et al. 2016	SAFHS	HR	TG 58:9	0.1171	0.0676518
632	Merino et al. 2018	FHS	HR	DG 36:1	1.11841	0.153295
689	Merino et al. 2018	FHS	HR	Glucose	0.239017	0.11895
749	Merino et al. 2018	FHS	HR	Glycine	-0.430783	0.0938073
849	Merino et al. 2018	FHS	HR	Isocitrate	0.470004	0.110585
994	Merino et al. 2018	FHS	HR	LPC 18:1	-0.356675	0.106452
1008	Merino et al. 2018	FHS	HR	LPC 18:2	-0.462035	0.0968068
1317	Merino et al. 2018	FHS	HR	PC 36:4	-0.446287	0.0985739
1464	Merino et al. 2018	FHS	HR	Phenylalanine	0.300105	0.101126
1667	Merino et al. 2018	FHS	HR	SM 42:1	-0.776529	0.105723
1706	Merino et al. 2018	FHS	HR	Taurine	-0.314711	0.0776758
1731	Merino et al. 2018	FHS	HR	TG 48:0	0.604316	0.12851
1738	Merino et al. 2018	FHS	HR	TG 48:1	0.593327	0.137193
1809	Merino et al. 2018	FHS	HR	TG 52:1	0.883768	0.175336
1882	Merino et al. 2018	FHS	HR	TG 54:8	0.463734	0.119139
1923	Merino et al. 2018	FHS	HR	TG 58:11	0.512824	0.122803
94	Muilwijk et al. 2020	HELIUS	HR	Acylcarnitine C10	-0.116534	0.130506
102	Muilwijk et al. 2020	HELIUS	HR	Acylcarnitine C10:1	-0.13207	0.141985
107	Muilwijk et al. 2020	HELIUS	HR	Acylcarnitine C12	-0.542584	0.152572
118	Muilwijk et al. 2020	HELIUS	HR	Acylcarnitine C12:1	-0.389153	0.127957
125	Muilwijk et al. 2020	HELIUS	HR	Acylcarnitine C12OH	-0.961938	0.187966
135	Muilwijk et al. 2020	HELIUS	HR	Acylcarnitine C14	-0.236772	0.13292
146	Muilwijk et al. 2020	HELIUS	HR	Acylcarnitine C14:1	-0.150823	0.129122
151	Muilwijk et al. 2020	HELIUS	HR	Acylcarnitine C14:1OH	-0.22405	0.128341
158	Muilwijk et al. 2020	HELIUS	HR	Acylcarnitine C14:2	0.00582252	0.137887
170	Muilwijk et al. 2020	HELIUS	HR	Acylcarnitine C16	-0.20272	0.132642
182	Muilwijk et al. 2020	HELIUS	HR	Acylcarnitine C16:1	-0.202332	0.133057
205	Muilwijk et al. 2020	HELIUS	HR	Acylcarnitine C18	-0.509583	0.150869
218	Muilwijk et al. 2020	HELIUS	HR	Acylcarnitine C18:1	-0.398938	0.134602
233	Muilwijk et al. 2020	HELIUS	HR	Acylcarnitine C18:2	-0.0660305	0.157494
250	Muilwijk et al. 2020	HELIUS	HR	Acylcarnitine C2	-0.3097	0.135924
279	Muilwijk et al. 2020	HELIUS	HR	Acylcarnitine C3	-0.226795	0.145696
291	Muilwijk et al. 2020	HELIUS	HR	Acylcarnitine C3DC	-0.467719	0.13735
299	Muilwijk et al. 2020	HELIUS	HR	Acylcarnitine C4	-0.596297	0.16277
323	Muilwijk et al. 2020	HELIUS	HR	Acylcarnitine C5	0.27433	0.141616
342	Muilwijk et al. 2020	HELIUS	HR	Acylcarnitine C5DC	-0.551446	0.14227
355	Muilwijk et al. 2020	HELIUS	HR	Acylcarnitine C6	-1.02324	0.219399
362	Muilwijk et al. 2020	HELIUS	HR	Acylcarnitine C6DC	-0.513305	0.137069
379	Muilwijk et al. 2020	HELIUS	HR	Acylcarnitine C8	-0.0624048	0.132222
411	Muilwijk et al. 2020	HELIUS	HR	Alanine	0.905326	0.168936
441	Muilwijk et al. 2020	HELIUS	HR	Arginine	0.016066	0.133027
452	Muilwijk et al. 2020	HELIUS	HR	Asparagine	0.897184	0.153157
460	Muilwijk et al. 2020	HELIUS	HR	Aspartate	0.188742	0.112744
485	Muilwijk et al. 2020	HELIUS	HR	Carnitine	-0.198888	0.138833
697	Muilwijk et al. 2020	HELIUS	HR	Glutamate	0.402595	0.124443
716	Muilwijk et al. 2020	HELIUS	HR	Glutamine	-0.954107	0.146347
750	Muilwijk et al. 2020	HELIUS	HR	Glycine	-0.857422	0.165356
859	Muilwijk et al. 2020	HELIUS	HR	Isoleucine	1.10391	0.176832
918	Muilwijk et al. 2020	HELIUS	HR	Leucine	0.822274	0.181874
1109	Muilwijk et al. 2020	HELIUS	HR	Lysine	0.347685	0.137368
1131	Muilwijk et al. 2020	HELIUS	HR	Methionine	0.639335	0.164385
1179	Muilwijk et al. 2020	HELIUS	HR	Ornithine	-0.161665	0.13717
1465	Muilwijk et al. 2020	HELIUS	HR	Phenylalanine	0.594115	0.138368
1503	Muilwijk et al. 2020	HELIUS	HR	Proline	0.855486	0.141662
1539	Muilwijk et al. 2020	HELIUS	HR	Serine	0.56391	0.141721
1969	Muilwijk et al. 2020	HELIUS	HR	Tryptophan	0.307535	0.150629
1987	Muilwijk et al. 2020	HELIUS	HR	Tyrosine	0.0828469	0.142623
2018	Muilwijk et al. 2020	HELIUS	HR	Valine	-0.00434171	0.138145
10	Noerman et al. 2019	KIHD	OR	1,3-dimethylurate	0.350657	0.136326
95	Noerman et al. 2019	KIHD	OR	Acylcarnitine C10	0.0582689	0.130934
108	Noerman et al. 2019	KIHD	OR	Acylcarnitine C12	0	0.128343
119	Noerman et al. 2019	KIHD	OR	Acylcarnitine C12:1	-0.0943107	0.127422
129	Noerman et al. 2019	KIHD	OR	Acylcarnitine C13	-0.0833816	0.128178
147	Noerman et al. 2019	KIHD	OR	Acylcarnitine C14:1	0.0295588	0.129674
171	Noerman et al. 2019	KIHD	OR	Acylcarnitine C16	-0.0100503	0.129649
183	Noerman et al. 2019	KIHD	OR	Acylcarnitine C16:1	-0.0833816	0.129593
192	Noerman et al. 2019	KIHD	OR	Acylcarnitine C16:2	-0.430783	0.138348
206	Noerman et al. 2019	KIHD	OR	Acylcarnitine C18	0.0487902	0.130313
219	Noerman et al. 2019	KIHD	OR	Acylcarnitine C18:1	-0.0304592	0.130313
234	Noerman et al. 2019	KIHD	OR	Acylcarnitine C18:2	-0.040822	0.131688
268	Noerman et al. 2019	KIHD	OR	Acylcarnitine C20:4	-0.371064	0.1379
300	Noerman et al. 2019	KIHD	OR	Acylcarnitine C4	0.00995033	0.130313
316	Noerman et al. 2019	KIHD	OR	Acylcarnitine C4OH	0.0392207	0.131585
390	Noerman et al. 2019	KIHD	OR	Acylcarnitine C8:1	0.0487902	0.129065
486	Noerman et al. 2019	KIHD	OR	Carnitine	0.0676586	0.129697
496	Noerman et al. 2019	KIHD	OR	Caffeine	0.378436	0.136167
544	Noerman et al. 2019	KIHD	OR	Choline	-0.371064	0.135081
587	Noerman et al. 2019	KIHD	OR	Creatinine	0.322083	0.13366
657	Noerman et al. 2019	KIHD	OR	Docosahexaenoate	-0.314711	0.134828
735	Noerman et al. 2019	KIHD	OR	Glycerophosphocholine	-0.261365	0.1346
809	Noerman et al. 2019	KIHD	OR	Histidine	-0.040822	0.128264
860	Noerman et al. 2019	KIHD	OR	Isoleucine	-0.0618754	0.128911
887	Noerman et al. 2019	KIHD	OR	Linoleate	-0.287682	0.135627
899	Noerman et al. 2019	KIHD	OR	Lactate	-0.328504	0.136725
919	Noerman et al. 2019	KIHD	OR	Leucine	-0.040822	0.128264
948	Noerman et al. 2019	KIHD	OR	LPC 16:0	-0.287682	0.131188
959	Noerman et al. 2019	KIHD	OR	LPC 16:1	-0.301105	0.135625
969	Noerman et al. 2019	KIHD	OR	LPC 17:0	-0.301105	0.14014
974	Noerman et al. 2019	KIHD	OR	LPC 17:1	-0.34249	0.138675
982	Noerman et al. 2019	KIHD	OR	LPC 18:0	-0.300528	0.0949763
995	Noerman et al. 2019	KIHD	OR	LPC 18:1	-0.320957	0.0943916
1009	Noerman et al. 2019	KIHD	OR	LPC 18:2	-0.274437	0.132034
1017	Noerman et al. 2019	KIHD	OR	LPC 19:1	-0.274437	0.132034
1024	Noerman et al. 2019	KIHD	OR	LPC 20:1	-0.494296	0.144336
1028	Noerman et al. 2019	KIHD	OR	LPC 20:2	-0.314711	0.134825
1041	Noerman et al. 2019	KIHD	OR	LPC 20:4	-0.400478	0.134205
1049	Noerman et al. 2019	KIHD	OR	LPC 20:5	-0.287682	0.131188
1051	Noerman et al. 2019	KIHD	OR	LPC 22:5	-0.462035	0.139701
1056	Noerman et al. 2019	KIHD	OR	LPC 22:6	-0.544727	0.142757
1205	Noerman et al. 2019	KIHD	OR	PC 30:0	0.300105	0.134205
1209	Noerman et al. 2019	KIHD	OR	PC 30:1	0.300105	0.134205
1231	Noerman et al. 2019	KIHD	OR	PC 32:2	0.34359	0.135917
1239	Noerman et al. 2019	KIHD	OR	PC 33:1	0.329304	0.134097
1266	Noerman et al. 2019	KIHD	OR	PC 34:2	0.29267	0.133754
1338	Noerman et al. 2019	KIHD	OR	PC 38:2	0.329304	0.134097
1377	Noerman et al. 2019	KIHD	OR	PC 40:4	-0.301105	0.135625
1466	Noerman et al. 2019	KIHD	OR	Phenylalanine	-0.18633	0.131109
1476	Noerman et al. 2019	KIHD	OR	Phosphocholine	-0.314711	0.134828
1500	Noerman et al. 2019	KIHD	OR	Piperine	0.277632	0.142759
1950	Noerman et al. 2019	KIHD	OR	Trimethylamine N-oxide	0.0582689	0.130934
1970	Noerman et al. 2019	KIHD	OR	Tryptophan	0.0582689	0.129065
1988	Noerman et al. 2019	KIHD	OR	Tyrosine	0.662688	0.148966
2005	Noerman et al. 2019	KIHD	OR	Uridine	0.277632	0.134322
2019	Noerman et al. 2019	KIHD	OR	Valine	0.0676586	0.129697
7	Ottosson et al. 2018	MPP	OR	1-methylnicotinamide	0.076961	0.0850325
136	Ottosson et al. 2018	MPP	OR	Acylcarnitine C14	-0.0618754	0.0922934
172	Ottosson et al. 2018	MPP	OR	Acylcarnitine C16	0.10436	0.0893374
251	Ottosson et al. 2018	MPP	OR	Acylcarnitine C2	0.0861777	0.100552
280	Ottosson et al. 2018	MPP	OR	Acylcarnitine C3	0.0198026	0.10649
301	Ottosson et al. 2018	MPP	OR	Acylcarnitine C4	0.0676586	0.10635
324	Ottosson et al. 2018	MPP	OR	Acylcarnitine C5	0.165514	0.111366
380	Ottosson et al. 2018	MPP	OR	Acylcarnitine C8	-0.116534	0.0882528
412	Ottosson et al. 2018	MPP	OR	Alanine	0.076961	0.110187
442	Ottosson et al. 2018	MPP	OR	Arginine	-0.105361	0.0896423
453	Ottosson et al. 2018	MPP	OR	Asparagine	-0.261365	0.104781
474	Ottosson et al. 2018	MPP	OR	Betaine	-0.18633	0.0920952
487	Ottosson et al. 2018	MPP	OR	Carnitine	0.173953	0.0973505
545	Ottosson et al. 2018	MPP	OR	Choline	0.157004	0.0909885
561	Ottosson et al. 2018	MPP	OR	Citrulline	-0.040822	0.0871809
575	Ottosson et al. 2018	MPP	OR	Cotinine	-0.0304592	0.0862788
663	Ottosson et al. 2018	MPP	OR	Dimethylglycine	0.198851	0.0914882
698	Ottosson et al. 2018	MPP	OR	Glutamate	0.41871	0.109582
717	Ottosson et al. 2018	MPP	OR	Glutamine	-0.261365	0.104781
810	Ottosson et al. 2018	MPP	OR	Histidine	-0.150823	0.0924217
861	Ottosson et al. 2018	MPP	OR	Isoleucine	0.322083	0.12458
920	Ottosson et al. 2018	MPP	OR	Leucine	0.285179	0.134775
1110	Ottosson et al. 2018	MPP	OR	Lysine	0.215111	0.108487
1132	Ottosson et al. 2018	MPP	OR	Methionine	0.0392207	0.0933506
1159	Ottosson et al. 2018	MPP	OR	Niacinamide	-0.0100503	0.0897561
1180	Ottosson et al. 2018	MPP	OR	Ornithine	0.239017	0.103435
1467	Ottosson et al. 2018	MPP	OR	Phenylalanine	0.0861777	0.109168
1528	Ottosson et al. 2018	MPP	OR	SDMA+ADMA	-0.0100503	0.0971358
1540	Ottosson et al. 2018	MPP	OR	Serine	-0.198451	0.104701
1707	Ottosson et al. 2018	MPP	OR	Taurine	-0.0833816	0.0909885
1943	Ottosson et al. 2018	MPP	OR	Threonine	-0.0202027	0.0537554
1971	Ottosson et al. 2018	MPP	OR	Tryptophan	0.0392207	0.0924504
1989	Ottosson et al. 2018	MPP	OR	Tyrosine	0.139762	0.107966
2020	Ottosson et al. 2018	MPP	OR	Valine	0.113329	0.119181
588	Ottosson et al. 2019	MDC	HR	Creatinine	0.0676586	0.0644122
589	Ottosson et al. 2019	MPP	OR	Creatinine	0.300105	0.0980153
825	Ottosson et al. 2019	MDC	HR	Hypoxanthine	0.215111	0.0555417
826	Ottosson et al. 2019	MPP	OR	Hypoxanthine	0.548121	0.195574
870	Ottosson et al. 2019	MDC	HR	Kynurenate	0.270027	0.0621485
871	Ottosson et al. 2019	MPP	OR	Kynurenate	0.741937	0.170759
1193	Ottosson et al. 2019	MDC	HR	Pantothenate	0.122218	0.0584353
1194	Ottosson et al. 2019	MPP	OR	Pantothenate	0.239017	0.0878702
1962	Ottosson et al. 2019	MDC	HR	Trimethyllysine	0.182322	0.0574008
1963	Ottosson et al. 2019	MPP	OR	Trimethyllysine	0.300105	0.0864733
1998	Ottosson et al. 2019	MDC	HR	Urea	0.131028	0.055922
1999	Ottosson et al. 2019	MPP	OR	Urea	0.173953	0.0999404
96	Palmer et al. 2015	IRAS	OR	Acylcarnitine C10	0.113329	0.175204
109	Palmer et al. 2015	IRAS	OR	Acylcarnitine C12	0.300105	0.207499
120	Palmer et al. 2015	IRAS	OR	Acylcarnitine C12:1	0.518794	0.218808
126	Palmer et al. 2015	IRAS	OR	Acylcarnitine C12OH	-0.127833	0.195272
137	Palmer et al. 2015	IRAS	OR	Acylcarnitine C14	-0.105361	0.164769
148	Palmer et al. 2015	IRAS	OR	Acylcarnitine C14:1	0.0582689	0.197242
152	Palmer et al. 2015	IRAS	OR	Acylcarnitine C14:1OH	0.0953102	0.204561
159	Palmer et al. 2015	IRAS	OR	Acylcarnitine C14:2	-0.0618754	0.190202
163	Palmer et al. 2015	IRAS	OR	Acylcarnitine C14OH	0.00995033	0.203513
173	Palmer et al. 2015	IRAS	OR	Acylcarnitine C16	-0.328504	0.181875
184	Palmer et al. 2015	IRAS	OR	Acylcarnitine C16:1	-0.139262	0.187237
188	Palmer et al. 2015	IRAS	OR	Acylcarnitine C16:1OH	-0.0943107	0.204536
193	Palmer et al. 2015	IRAS	OR	Acylcarnitine C16:2	0.14842	0.200244
198	Palmer et al. 2015	IRAS	OR	Acylcarnitine C16OH	-0.174353	0.22412
207	Palmer et al. 2015	IRAS	OR	Acylcarnitine C18	-0.127833	0.168593
220	Palmer et al. 2015	IRAS	OR	Acylcarnitine C18:1	-0.127833	0.18707
227	Palmer et al. 2015	IRAS	OR	Acylcarnitine C18:1OH	0.113329	0.207248
235	Palmer et al. 2015	IRAS	OR	Acylcarnitine C18:2	-0.0943107	0.174853
240	Palmer et al. 2015	IRAS	OR	Acylcarnitine C18:2OH	0.371564	0.264978
242	Palmer et al. 2015	IRAS	OR	Acylcarnitine C18OH	0.0676586	0.188612
252	Palmer et al. 2015	IRAS	OR	Acylcarnitine C2	0.207014	0.220663
264	Palmer et al. 2015	IRAS	OR	Acylcarnitine C20	0.223144	0.19124
269	Palmer et al. 2015	IRAS	OR	Acylcarnitine C20:4	0.076961	0.235244
281	Palmer et al. 2015	IRAS	OR	Acylcarnitine C3	0.182322	0.214295
293	Palmer et al. 2015	IRAS	OR	Acylcarnitine C3DC	0.364643	0.234308
302	Palmer et al. 2015	IRAS	OR	Acylcarnitine C4	-0.673345	0.376507
311	Palmer et al. 2015	IRAS	OR	Acylcarnitine C4DC	0.0392207	0.216683
317	Palmer et al. 2015	IRAS	OR	Acylcarnitine C4OH	0.350657	0.247296
335	Palmer et al. 2015	IRAS	OR	Acylcarnitine C5:1	-0.478036	0.176823
344	Palmer et al. 2015	IRAS	OR	Acylcarnitine C5DC	-0.0943107	0.200757
348	Palmer et al. 2015	IRAS	OR	Acylcarnitine C5OH	0.364643	0.234308
356	Palmer et al. 2015	IRAS	OR	Acylcarnitine C6	-0.1906	0.1373
365	Palmer et al. 2015	IRAS	OR	Acylcarnitine C6DC	0	0.200444
374	Palmer et al. 2015	IRAS	OR	Acylcarnitine C7DC	0.542324	0.264793
381	Palmer et al. 2015	IRAS	OR	Acylcarnitine C8	0.0487902	0.163031
391	Palmer et al. 2015	IRAS	OR	Acylcarnitine C8:1	-0.0304592	0.161358
413	Palmer et al. 2015	IRAS	OR	Alanine	0.582216	0.217727
443	Palmer et al. 2015	IRAS	OR	Arginine	0.198851	0.196057
562	Palmer et al. 2015	IRAS	OR	Citrulline	0.0198026	0.192717
751	Palmer et al. 2015	IRAS	OR	Glycine	-0.579818	0.228015
811	Palmer et al. 2015	IRAS	OR	Histidine	-0.287682	0.191132
1133	Palmer et al. 2015	IRAS	OR	Methionine	-0.400478	0.26037
1181	Palmer et al. 2015	IRAS	OR	Ornithine	0.0861777	0.195112
1468	Palmer et al. 2015	IRAS	OR	Phenylalanine	0.542324	0.253202
1541	Palmer et al. 2015	IRAS	OR	Serine	-0.274437	0.226353
1990	Palmer et al. 2015	IRAS	OR	Tyrosine	0.34359	0.211401
2021	Palmer et al. 2015	IRAS	OR	Valine	0.732368	0.218794
475	Papandreou et al. 2018	PREDIMED	HR	Betaine	-0.287682	0.102037
488	Papandreou et al. 2018	PREDIMED	HR	Carnitine	-0.210721	0.0943924
546	Papandreou et al. 2018	PREDIMED	HR	Choline	-0.0618754	0.1001
736	Papandreou et al. 2018	PREDIMED	HR	Glycerophosphocholine	-0.494296	0.156168
937	Papandreou et al. 2018	PREDIMED	HR	LPC 14:0	0.00995033	0.0972859
949	Papandreou et al. 2018	PREDIMED	HR	LPC 16:0	-0.371064	0.106452
960	Papandreou et al. 2018	PREDIMED	HR	LPC 16:1	-0.0725707	0.0955833
983	Papandreou et al. 2018	PREDIMED	HR	LPC 18:0	-0.430783	0.121144
996	Papandreou et al. 2018	PREDIMED	HR	LPC 18:1	-0.371064	0.0883342
1042	Papandreou et al. 2018	PREDIMED	HR	LPC 20:4	-0.400478	0.103433
1057	Papandreou et al. 2018	PREDIMED	HR	LPC 22:6	-0.223144	0.0917472
1067	Papandreou et al. 2018	PREDIMED	HR	LPE 16:0	-0.314711	0.100583
1082	Papandreou et al. 2018	PREDIMED	HR	LPE 18:1	-0.174353	0.0946574
1477	Papandreou et al. 2018	PREDIMED	HR	Phosphocholine	-0.105361	0.0930212
1951	Papandreou et al. 2018	PREDIMED	HR	Trimethylamine N-oxide	-0.18633	0.0971975
4	Peddinti et al. 2017	BPS	HR	1,5-anhydrosorbitol	-0.0275768	0.132345
8	Peddinti et al. 2017	BPS	HR	1-methylurate	-0.151754	0.141072
11	Peddinti et al. 2017	BPS	HR	1,3-dimethylurate	0.0998453	0.126268
12	Peddinti et al. 2017	BPS	HR	2-aminobutyrate	0.231905	0.128222
19	Peddinti et al. 2017	BPS	HR	2-hydroxybutyrate	0.484276	0.141883
23	Peddinti et al. 2017	BPS	HR	2-hydroxyglutarate	0.178146	0.122598
25	Peddinti et al. 2017	BPS	HR	2-hydroxyhippurate	0.215111	0.139704
27	Peddinti et al. 2017	BPS	HR	2-hydroxyisobutyrate	0.231112	0.139704
29	Peddinti et al. 2017	BPS	HR	2-ketobutyrate	-0.103695	0.148222
31	Peddinti et al. 2017	BPS	HR	3-(4-hydroxyphenyl)lactate	0.13715	0.136046
34	Peddinti et al. 2017	BPS	HR	3-hydroxy-2-ethylpropionate	0.231905	0.128222
43	Peddinti et al. 2017	BPS	HR	3-hydroxybutyrate	0.216723	0.116004
45	Peddinti et al. 2017	BPS	HR	3-hydroxydecanoate	0.0487902	0.126505
48	Peddinti et al. 2017	BPS	HR	3-hydroxyisobutyrate	0.227932	0.14543
52	Peddinti et al. 2017	BPS	HR	3-hydroxyoctanoate	0.33146	0.130313
53	Peddinti et al. 2017	BPS	HR	3-hydroxypyruvate	0.0266419	0.121884
56	Peddinti et al. 2017	BPS	HR	3-methoxytyrosine	-0.0363528	0.128264
62	Peddinti et al. 2017	BPS	HR	3-methyl-2-oxobutyrate	-0.247436	0.146502
67	Peddinti et al. 2017	BPS	HR	3-methyl-2-oxovalerate	-0.215175	0.138542
74	Peddinti et al. 2017	BPS	HR	4-methyl-2-oxopentanoate	-0.18633	0.137499
82	Peddinti et al. 2017	BPS	HR	Arachidonate	0.161268	0.129189
97	Peddinti et al. 2017	BPS	HR	Acylcarnitine C10	-0.159699	0.14857
110	Peddinti et al. 2017	BPS	HR	Acylcarnitine C12	-0.163461	0.138163
174	Peddinti et al. 2017	BPS	HR	Acylcarnitine C16	-0.037079	0.131688
208	Peddinti et al. 2017	BPS	HR	Acylcarnitine C18	-0.173758	0.135833
221	Peddinti et al. 2017	BPS	HR	Acylcarnitine C18:1	-0.313342	0.146777
253	Peddinti et al. 2017	BPS	HR	Acylcarnitine C2	-0.759928	0.286972
282	Peddinti et al. 2017	BPS	HR	Acylcarnitine C3	-0.272728	0.150451
303	Peddinti et al. 2017	BPS	HR	Acylcarnitine C4	-0.0610247	0.165313
325	Peddinti et al. 2017	BPS	HR	Acylcarnitine C5	0.072	0.095
336	Peddinti et al. 2017	BPS	HR	Acylcarnitine C5:1	-0.0633659	0.121188
343	Peddinti et al. 2017	BPS	HR	Acylcarnitine C5DC	0.00399202	0.135559
357	Peddinti et al. 2017	BPS	HR	Acylcarnitine C6	-0.178529	0.131109
363	Peddinti et al. 2017	BPS	HR	Acylcarnitine C6DC	-0.139952	0.145547
382	Peddinti et al. 2017	BPS	HR	Acylcarnitine C8	-0.121716	0.143319
399	Peddinti et al. 2017	BPS	HR	Adrenate	0.227932	0.130838
414	Peddinti et al. 2017	BPS	HR	Alanine	0.0497421	0.134064
423	Peddinti et al. 2017	BPS	HR	2-hydroxyisocaproate	0.0506931	0.139089
426	Peddinti et al. 2017	BPS	HR	2-hydroxy-3-methylbutyrate	0.183155	0.163275
430	Peddinti et al. 2017	BPS	HR	Oxoglutarate	-0.250129	0.153403
444	Peddinti et al. 2017	BPS	HR	Arginine	0.254642	0.136423
461	Peddinti et al. 2017	BPS	HR	Aspartate	-0.115635	0.128085
465	Peddinti et al. 2017	BPS	HR	Benzoate	-0.139722	0.139424
470	Peddinti et al. 2017	BPS	HR	3-hydroxyisovalerate	0.0629748	0.138276
476	Peddinti et al. 2017	BPS	HR	Betaine	-0.249103	0.148966
489	Peddinti et al. 2017	BPS	HR	Carnitine	0.219136	0.136612
497	Peddinti et al. 2017	BPS	HR	Caffeine	-0.138802	0.137177
542	Peddinti et al. 2017	BPS	HR	Cholate	-0.171144	0.197612
547	Peddinti et al. 2017	BPS	HR	Choline	-0.274963	0.179219
557	Peddinti et al. 2017	BPS	HR	Citrate	-0.00440971	0.136939
563	Peddinti et al. 2017	BPS	HR	Citrulline	-0.0846868	0.153259
571	Peddinti et al. 2017	BPS	HR	3-carboxy-4-methyl-5-propyl-2-furanpropionate	-0.191282	0.139208
576	Peddinti et al. 2017	BPS	HR	Cotinine	0.266969	0.123282
578	Peddinti et al. 2017	BPS	HR	Creatine	-0.202728	0.152297
590	Peddinti et al. 2017	BPS	HR	Creatinine	-0.0886127	0.14117
595	Peddinti et al. 2017	BPS	HR	3-dehydrocarnitine	-0.13045	0.133341
597	Peddinti et al. 2017	BPS	HR	Deoxycarnitine	-0.250515	0.148966
603	Peddinti et al. 2017	BPS	HR	Deoxycholate	-0.331286	0.184673
658	Peddinti et al. 2017	BPS	HR	Docosahexaenoate	0.0497421	0.137233
661	Peddinti et al. 2017	BPS	HR	Dihomo-gamma-linolenate	0.193921	0.130855
664	Peddinti et al. 2017	BPS	HR	Dimethylglycine	-0.112721	0.152509
669	Peddinti et al. 2017	BPS	HR	Docosapentaenoate	0.0305292	0.132883
672	Peddinti et al. 2017	BPS	HR	Eicosapentaenoate	0.00399202	0.126358
675	Peddinti et al. 2017	BPS	HR	Erythirol	0.0676586	0.138276
678	Peddinti et al. 2017	BPS	HR	Fructose	-0.119009	0.145547
686	Peddinti et al. 2017	BPS	HR	Gluconate	-0.232437	0.457081
690	Peddinti et al. 2017	BPS	HR	Glucose	0.582216	0.142759
699	Peddinti et al. 2017	BPS	HR	Glutamate	0.306749	0.149111
718	Peddinti et al. 2017	BPS	HR	Glutamine	-0.526108	0.186215
732	Peddinti et al. 2017	BPS	HR	Glycerol	-0.530008	0.790457
737	Peddinti et al. 2017	BPS	HR	Glycerophosphocholine	0.0592119	0.130934
752	Peddinti et al. 2017	BPS	HR	Glycine	-0.311838	0.159395
761	Peddinti et al. 2017	BPS	HR	Glycochenodeoxycholate	-0.12409	0.15352
765	Peddinti et al. 2017	BPS	HR	Glycocholate	0.120446	0.15602
772	Peddinti et al. 2017	BPS	HR	Hexadecanedioate	0.131905	0.119899
793	Peddinti et al. 2017	BPS	HR	Hippurate	-0.139607	0.143319
812	Peddinti et al. 2017	BPS	HR	Histidine	-0.400776	0.136246
819	Peddinti et al. 2017	BPS	HR	Hydrocinnamate	-0.265008	0.157561
827	Peddinti et al. 2017	BPS	HR	Hypoxanthine	-0.215672	0.136101
830	Peddinti et al. 2017	BPS	HR	Indoleacetate	-0.238511	0.341619
835	Peddinti et al. 2017	BPS	HR	Indolelactate	0.0989399	0.127929
841	Peddinti et al. 2017	BPS	HR	Indolepropionate	-0.187535	0.154233
845	Peddinti et al. 2017	BPS	HR	Inosine	0.0363319	0.152174
862	Peddinti et al. 2017	BPS	HR	Isoleucine	0.404798	0.161285
874	Peddinti et al. 2017	BPS	HR	Kynurenine	-0.28955	0.145349
888	Peddinti et al. 2017	BPS	HR	Linoleate	-0.0976128	0.128851
900	Peddinti et al. 2017	BPS	HR	Lactate	-0.292896	0.132984
904	Peddinti et al. 2017	BPS	HR	Laurate	-0.0488752	0.140726
921	Peddinti et al. 2017	BPS	HR	Leucine	0.259283	0.158743
932	Peddinti et al. 2017	BPS	HR	Linolenate	-0.101922	0.132521
938	Peddinti et al. 2017	BPS	HR	LPC 14:0	-0.12511	0.137814
942	Peddinti et al. 2017	BPS	HR	LPC 15:0	-0.0501361	0.117762
950	Peddinti et al. 2017	BPS	HR	LPC 16:0	0.0266589	0.0922054
961	Peddinti et al. 2017	BPS	HR	LPC 16:1	-0.13456	0.147753
970	Peddinti et al. 2017	BPS	HR	LPC 17:0	-0.127493	0.129559
984	Peddinti et al. 2017	BPS	HR	LPC 18:0	-0.191185	0.0954409
997	Peddinti et al. 2017	BPS	HR	LPC 18:1	-0.0297378	0.137784
1021	Peddinti et al. 2017	BPS	HR	LPC 20:0	-0.257347	0.150935
1029	Peddinti et al. 2017	BPS	HR	LPC 20:2	-0.191766	0.135124
1034	Peddinti et al. 2017	BPS	HR	LPC 20:3	-0.139952	0.131071
1043	Peddinti et al. 2017	BPS	HR	LPC 20:4	-0.0563587	0.128909
1052	Peddinti et al. 2017	BPS	HR	LPC 22:5	-0.0903624	0.12742
1058	Peddinti et al. 2017	BPS	HR	LPC 22:6	0.00796817	0.123106
1068	Peddinti et al. 2017	BPS	HR	LPE 16:0	-0.0232966	0.0899552
1076	Peddinti et al. 2017	BPS	HR	LPE 18:0	0.10075	0.134478
1083	Peddinti et al. 2017	BPS	HR	LPE 18:1	-0.0666741	0.133209
1089	Peddinti et al. 2017	BPS	HR	LPE 18:2	-0.0364565	0.15987
1096	Peddinti et al. 2017	BPS	HR	LPE 20:4	-0.00793137	0.14227
1111	Peddinti et al. 2017	BPS	HR	Lysine	-0.141564	0.131073
1120	Peddinti et al. 2017	BPS	HR	Malate	-0.100594	0.13104
1122	Peddinti et al. 2017	BPS	HR	Mannitol	-0.0621946	0.128911
1124	Peddinti et al. 2017	BPS	HR	Mannose	0.551007	0.139727
1139	Peddinti et al. 2017	BPS	HR	MG 16:1	0.188966	0.176823
1141	Peddinti et al. 2017	BPS	HR	MG 18:0	0.326422	0.158687
1144	Peddinti et al. 2017	BPS	HR	MG 18:1	0.270027	0.139827
1149	Peddinti et al. 2017	BPS	HR	Myo-inositol	-0.0698861	0.13243
1153	Peddinti et al. 2017	BPS	HR	Mystrate	0.0324672	0.134794
1155	Peddinti et al. 2017	BPS	HR	N-acetylglycine	0.0285875	0.143232
1160	Peddinti et al. 2017	BPS	HR	Niacinamide	0.0723207	0.134631
1168	Peddinti et al. 2017	BPS	HR	Octadecanedioate	0.0158733	0.134207
1172	Peddinti et al. 2017	BPS	HR	Oleate	0.00299551	0.131634
1182	Peddinti et al. 2017	BPS	HR	Ornithine	-0.223769	0.133637
1189	Peddinti et al. 2017	BPS	HR	Palmitate	0.111541	0.12677
1191	Peddinti et al. 2017	BPS	HR	Palmitooleate	-0.129198	0.143861
1195	Peddinti et al. 2017	BPS	HR	Pantothenate	-0.10159	0.139424
1198	Peddinti et al. 2017	BPS	HR	Paraxanthine	-0.0909099	0.133212
1453	Peddinti et al. 2017	BPS	HR	Pelargonate	0.0188218	0.129018
1456	Peddinti et al. 2017	BPS	HR	Pentadecanoate	0.0989399	0.127929
1469	Peddinti et al. 2017	BPS	HR	Phenylalanine	-0.120925	0.140025
1501	Peddinti et al. 2017	BPS	HR	Piperine	-0.262144	0.164731
1505	Peddinti et al. 2017	BPS	HR	Pseudouridine	-0.0893778	0.135364
1518	Peddinti et al. 2017	BPS	HR	Pyruvate	0.0497421	0.125286
1529	Peddinti et al. 2017	BPS	HR	SDMA+ADMA	0.0363319	0.171599
1542	Peddinti et al. 2017	BPS	HR	Serine	-0.132161	0.156072
1575	Peddinti et al. 2017	BPS	HR	SM 34:1	-0.0278852	0.137786
1600	Peddinti et al. 2017	BPS	HR	SM 36:1	0.138021	0.136046
1695	Peddinti et al. 2017	BPS	HR	Sphingosine	-0.0773131	0.131746
1698	Peddinti et al. 2017	BPS	HR	Stearate	0.251537	0.12521
1700	Peddinti et al. 2017	BPS	HR	Stearidonate	0.00598207	0.133604
1703	Peddinti et al. 2017	BPS	HR	Succinate	0.0998453	0.123176
1713	Peddinti et al. 2017	BPS	HR	Taurochenodeoxycholate	0.0363319	0.140834
1716	Peddinti et al. 2017	BPS	HR	Taurocholate	0.114221	0.219166
1718	Peddinti et al. 2017	BPS	HR	Taurodeoxycholate	0.0353671	0.148839
1720	Peddinti et al. 2017	BPS	HR	Tetradecanedioate	0.0998453	0.112919
1934	Peddinti et al. 2017	BPS	HR	Theobromine	-0.227779	0.147047
1936	Peddinti et al. 2017	BPS	HR	Theophylline	0.168054	0.185098
1938	Peddinti et al. 2017	BPS	HR	Threonate	-0.301781	0.140143
1944	Peddinti et al. 2017	BPS	HR	Threonine	-0.0688143	0.143798
1957	Peddinti et al. 2017	BPS	HR	Trehalose	0.248421	0.122099
1959	Peddinti et al. 2017	BPS	HR	Trigonelline	-0.0822952	0.145386
1972	Peddinti et al. 2017	BPS	HR	Tryptophan	-0.0290169	0.139787
1991	Peddinti et al. 2017	BPS	HR	Tyrosine	-0.0760175	0.141716
2000	Peddinti et al. 2017	BPS	HR	Urea	-0.099268	0.136882
2003	Peddinti et al. 2017	BPS	HR	Urate	0.0324672	0.143692
2006	Peddinti et al. 2017	BPS	HR	Uridine	-0.30327	0.137499
2022	Peddinti et al. 2017	BPS	HR	Valine	0.3379	0.153733
2030	Peddinti et al. 2017	BPS	HR	Xanthine	-0.0561472	0.115611
2032	Peddinti et al. 2017	BPS	HR	g-tocopherol	-0.129426	0.127294
98	Qiu et al. 2016	DFTJ	OR	Acylcarnitine C10	0.0295588	0.0619211
99	Qiu et al. 2016	JSNCD	OR	Acylcarnitine C10	-0.105361	0.0848739
111	Qiu et al. 2016	DFTJ	OR	Acylcarnitine C12	-0.0100503	0.059233
112	Qiu et al. 2016	JSNCD	OR	Acylcarnitine C12	0.0582689	0.0886851
138	Qiu et al. 2016	DFTJ	OR	Acylcarnitine C14	0.00995033	0.0603033
139	Qiu et al. 2016	JSNCD	OR	Acylcarnitine C14	0.239017	0.0936221
175	Qiu et al. 2016	DFTJ	OR	Acylcarnitine C16	0.10436	0.0620781
176	Qiu et al. 2016	JSNCD	OR	Acylcarnitine C16	0.307485	0.0988384
209	Qiu et al. 2016	DFTJ	OR	Acylcarnitine C18	0.0582689	0.0622951
210	Qiu et al. 2016	JSNCD	OR	Acylcarnitine C18	-0.235722	0.0955851
254	Qiu et al. 2016	DFTJ	OR	Acylcarnitine C2	0.182322	0.0611801
255	Qiu et al. 2016	JSNCD	OR	Acylcarnitine C2	-0.261365	0.0913807
283	Qiu et al. 2016	DFTJ	OR	Acylcarnitine C3	0.285179	0.065078
284	Qiu et al. 2016	JSNCD	OR	Acylcarnitine C3	-0.235722	0.0929138
304	Qiu et al. 2016	DFTJ	OR	Acylcarnitine C4	0.0295588	0.0591331
305	Qiu et al. 2016	JSNCD	OR	Acylcarnitine C4	-0.198451	0.0920952
326	Qiu et al. 2016	DFTJ	OR	Acylcarnitine C5	0.198851	0.0667462
327	Qiu et al. 2016	JSNCD	OR	Acylcarnitine C5	-0.0100503	0.100266
358	Qiu et al. 2016	DFTJ	OR	Acylcarnitine C6	0.0582689	0.0601604
359	Qiu et al. 2016	JSNCD	OR	Acylcarnitine C6	-0.0833816	0.0909885
383	Qiu et al. 2016	DFTJ	OR	Acylcarnitine C8	-0.0100503	0.059233
384	Qiu et al. 2016	JSNCD	OR	Acylcarnitine C8	0.00995033	0.0849858
415	Qiu et al. 2016	DFTJ	OR	Alanine	0.14842	0.0638328
416	Qiu et al. 2016	JSNCD	OR	Alanine	0.470004	0.1093
435	Qiu et al. 2016	DFTJ	OR	3-aminoisobutanate	-0.0304592	0.062789
436	Qiu et al. 2016	JSNCD	OR	3-aminoisobutanate	-0.18633	0.0909885
445	Qiu et al. 2016	DFTJ	OR	Arginine	-0.0100503	0.0615209
446	Qiu et al. 2016	JSNCD	OR	Arginine	-0.235722	0.0863781
454	Qiu et al. 2016	DFTJ	OR	Asparagine	0.0953102	0.0646946
455	Qiu et al. 2016	JSNCD	OR	Asparagine	-0.040822	0.105606
477	Qiu et al. 2016	DFTJ	OR	Betaine	-0.0618754	0.0623976
478	Qiu et al. 2016	JSNCD	OR	Betaine	-0.274437	0.0965954
490	Qiu et al. 2016	DFTJ	OR	Carnitine	0	0.060906
491	Qiu et al. 2016	JSNCD	OR	Carnitine	-0.18633	0.0884246
548	Qiu et al. 2016	DFTJ	OR	Choline	0.0392207	0.0613228
549	Qiu et al. 2016	JSNCD	OR	Choline	-0.261365	0.0925779
564	Qiu et al. 2016	DFTJ	OR	Citrulline	0.0582689	0.0622951
565	Qiu et al. 2016	JSNCD	OR	Citrulline	-0.0618754	0.102328
579	Qiu et al. 2016	DFTJ	OR	Creatine	-0.0202027	0.0621485
580	Qiu et al. 2016	JSNCD	OR	Creatine	0.0676586	0.0927025
591	Qiu et al. 2016	DFTJ	OR	Creatinine	-0.040822	0.066462
592	Qiu et al. 2016	JSNCD	OR	Creatinine	-0.34249	0.11367
665	Qiu et al. 2016	DFTJ	OR	Dimethylglycine	0.139762	0.0772245
666	Qiu et al. 2016	JSNCD	OR	Dimethylglycine	-0.261365	0.102082
700	Qiu et al. 2016	DFTJ	OR	Glutamate	0.131028	0.0649597
701	Qiu et al. 2016	JSNCD	OR	Glutamate	0.113329	0.0885343
719	Qiu et al. 2016	DFTJ	OR	Glutamine	-0.0202027	0.0598399
720	Qiu et al. 2016	JSNCD	OR	Glutamine	0.00995033	0.0931055
738	Qiu et al. 2016	DFTJ	OR	Glycerophosphocholine	-0.116534	0.0601332
739	Qiu et al. 2016	JSNCD	OR	Glycerophosphocholine	-0.105361	0.0872693
794	Qiu et al. 2016	DFTJ	OR	Hippurate	0.10436	0.0615209
795	Qiu et al. 2016	JSNCD	OR	Hippurate	-0.198451	0.0832183
799	Qiu et al. 2016	DFTJ	OR	Histamine	0.131028	0.0649597
800	Qiu et al. 2016	JSNCD	OR	Histamine	0.113329	0.112712
813	Qiu et al. 2016	DFTJ	OR	Histidine	0.131028	0.0643913
814	Qiu et al. 2016	JSNCD	OR	Histidine	-0.18633	0.104701
822	Qiu et al. 2016	DFTJ	OR	Hydrooxyproline	0.0487902	0.0628888
823	Qiu et al. 2016	JSNCD	OR	Hydrooxyproline	0.0392207	0.109438
828	Qiu et al. 2016	DFTJ	OR	Hypoxanthine	0.173953	0.0597961
829	Qiu et al. 2016	JSNCD	OR	Hypoxanthine	-0.0618754	0.0835468
831	Qiu et al. 2016	DFTJ	OR	Indoleacetate	-0.040822	0.063443
832	Qiu et al. 2016	JSNCD	OR	Indoleacetate	-0.274437	0.0993533
846	Qiu et al. 2016	DFTJ	OR	Inosine	0.182322	0.0635755
847	Qiu et al. 2016	JSNCD	OR	Inosine	0.0392207	0.0904014
1112	Qiu et al. 2016	DFTJ	OR	Lysine	0.113329	0.0635376
1113	Qiu et al. 2016	JSNCD	OR	Lysine	-0.0618754	0.0890436
1134	Qiu et al. 2016	DFTJ	OR	Methionine	0.0295588	0.0662819
1135	Qiu et al. 2016	JSNCD	OR	Methionine	-0.0202027	0.0853953
1161	Qiu et al. 2016	DFTJ	OR	Niacinamide	0.29267	0.0607542
1162	Qiu et al. 2016	JSNCD	OR	Niacinamide	-0.150823	0.085335
1164	Qiu et al. 2016	DFTJ	OR	NMMA	0.0582689	0.0650235
1165	Qiu et al. 2016	JSNCD	OR	NMMA	-0.198451	0.0932295
1183	Qiu et al. 2016	DFTJ	OR	Ornithine	0.215111	0.0638506
1184	Qiu et al. 2016	JSNCD	OR	Ornithine	0.10436	0.0940205
1196	Qiu et al. 2016	DFTJ	OR	Pantothenate	0.254642	0.0671033
1197	Qiu et al. 2016	JSNCD	OR	Pantothenate	-0.174353	0.0971975
1470	Qiu et al. 2016	DFTJ	OR	Phenylalanine	0.076961	0.0706599
1471	Qiu et al. 2016	JSNCD	OR	Phenylalanine	0.405465	0.0964835
1530	Qiu et al. 2016	DFTJ	OR	SDMA+ADMA	0.0198026	0.0625312
1531	Qiu et al. 2016	JSNCD	OR	SDMA+ADMA	-0.223144	0.0955851
1543	Qiu et al. 2016	DFTJ	OR	Serine	0.00995033	0.0653816
1544	Qiu et al. 2016	JSNCD	OR	Serine	-0.18633	0.0909885
1548	Qiu et al. 2016	DFTJ	OR	Serotonin	0.262364	0.0626277
1708	Qiu et al. 2016	DFTJ	OR	Taurine	0.270027	0.060419
1709	Qiu et al. 2016	JSNCD	OR	Taurine	-0.0943107	0.0863076
1945	Qiu et al. 2016	DFTJ	OR	Threonine	0.0487902	0.0656467
1946	Qiu et al. 2016	JSNCD	OR	Threonine	0.0487902	0.0895349
1952	Qiu et al. 2016	DFTJ	OR	Trimethylamine N-oxide	0.076961	0.061141
1953	Qiu et al. 2016	JSNCD	OR	Trimethylamine N-oxide	0.29267	0.0925779
1973	Qiu et al. 2016	DFTJ	OR	Tryptophan	-0.0512933	0.066462
1974	Qiu et al. 2016	JSNCD	OR	Tryptophan	-0.494296	0.111968
1992	Qiu et al. 2016	DFTJ	OR	Tyrosine	0.173953	0.117513
1993	Qiu et al. 2016	JSNCD	OR	Tyrosine	0.392042	0.107652
2007	Qiu et al. 2016	DFTJ	OR	Uridine	0.0582689	0.0622951
2008	Qiu et al. 2016	JSNCD	OR	Uridine	-0.415515	0.127294
2023	Qiu et al. 2016	DFTJ	OR	Valine	0.131028	0.0649597
2024	Qiu et al. 2016	JSNCD	OR	Valine	0.139762	0.0944198
431	Razquin et al. 2019	PREDIMED	HR	Aminoadipate	0.19062	0.100845
1114	Razquin et al. 2019	PREDIMED	HR	Lysine	0.182322	0.0955851
32	Rebholz et al. 2018	ARIC	HR	3-(4-hydroxyphenyl)lactate	0.438255	0.107452
676	Rebholz et al. 2018	ARIC	HR	Erythirol	0.14842	0.133482
863	Rebholz et al. 2018	ARIC	HR	Isoleucine	1.08519	0.195683
922	Rebholz et al. 2018	ARIC	HR	Leucine	0.86289	0.191274
1958	Rebholz et al. 2018	ARIC	HR	Trehalose	0.14842	0.0349403
620	Rhee et al. 2011	FHS	HR	DG 34:1	0.123986	0.226621
627	Rhee et al. 2011	FHS	HR	DG 34:2	-0.0345914	0.233998
637	Rhee et al. 2011	FHS	HR	DG 36:2	-0.225647	0.255892
939	Rhee et al. 2011	FHS	HR	LPC 14:0	0.219938	0.136022
951	Rhee et al. 2011	FHS	HR	LPC 16:0	-0.0253178	0.133957
962	Rhee et al. 2011	FHS	HR	LPC 16:1	-0.125563	0.128219
985	Rhee et al. 2011	FHS	HR	LPC 18:0	-0.0418642	0.122209
1035	Rhee et al. 2011	FHS	HR	LPC 20:3	-0.0387408	0.13524
1044	Rhee et al. 2011	FHS	HR	LPC 20:4	-0.209487	0.130392
1050	Rhee et al. 2011	FHS	HR	LPC 20:5	-0.170788	0.122338
1059	Rhee et al. 2011	FHS	HR	LPC 22:6	-0.365283	0.133727
1069	Rhee et al. 2011	FHS	HR	LPE 16:0	0.225541	0.150338
1077	Rhee et al. 2011	FHS	HR	LPE 18:0	-0.018164	0.125482
1084	Rhee et al. 2011	FHS	HR	LPE 18:1	0.107059	0.133623
1090	Rhee et al. 2011	FHS	HR	LPE 18:2	0.327864	0.135432
1097	Rhee et al. 2011	FHS	HR	LPE 20:4	-0.0130852	0.132646
1101	Rhee et al. 2011	FHS	HR	LPE 22:6	-0.071496	0.122106
1216	Rhee et al. 2011	FHS	HR	PC 32:0	0.0695261	0.128774
1224	Rhee et al. 2011	FHS	HR	PC 32:1	0.151003	0.142259
1232	Rhee et al. 2011	FHS	HR	PC 32:2	0.284427	0.148598
1258	Rhee et al. 2011	FHS	HR	PC 34:1	0.0667236	0.134191
1267	Rhee et al. 2011	FHS	HR	PC 34:2	0.385262	0.166757
1276	Rhee et al. 2011	FHS	HR	PC 34:3	0.113329	0.154764
1281	Rhee et al. 2011	FHS	HR	PC 34:4	0.228728	0.152575
1295	Rhee et al. 2011	FHS	HR	PC 36:1	0.152721	0.134606
1304	Rhee et al. 2011	FHS	HR	PC 36:2	0.300845	0.145861
1310	Rhee et al. 2011	FHS	HR	PC 36:3	0.0944007	0.154681
1339	Rhee et al. 2011	FHS	HR	PC 38:2	0.0971267	0.137724
1346	Rhee et al. 2011	FHS	HR	PC 38:3	0.258511	0.147036
1352	Rhee et al. 2011	FHS	HR	PC 38:4	-0.115411	0.13031
1357	Rhee et al. 2011	FHS	HR	PC 38:5	-0.114289	0.135406
1365	Rhee et al. 2011	FHS	HR	PC 38:6	-0.24718	0.125421
1387	Rhee et al. 2011	FHS	HR	PC 40:6	-0.231932	0.128648
1557	Rhee et al. 2011	FHS	HR	SM 32:1	-0.0565704	0.147249
1576	Rhee et al. 2011	FHS	HR	SM 34:1	0.150143	0.134052
1586	Rhee et al. 2011	FHS	HR	SM 34:2	-0.0100503	0.1357
1601	Rhee et al. 2011	FHS	HR	SM 36:1	-0.0629398	0.131155
1611	Rhee et al. 2011	FHS	HR	SM 36:2	-0.0555127	0.123352
1619	Rhee et al. 2011	FHS	HR	SM 36:3	-0.0283995	0.116289
1644	Rhee et al. 2011	FHS	HR	SM 40:1	0.319181	0.139117
1650	Rhee et al. 2011	FHS	HR	SM 40:2	0.0723207	0.152669
1675	Rhee et al. 2011	FHS	HR	SM 42:2	-0.0932124	0.176229
1723	Rhee et al. 2011	FHS	HR	TG 46:1	0.366031	0.181077
1726	Rhee et al. 2011	FHS	HR	TG 46:2	0.360468	0.184874
1744	Rhee et al. 2011	FHS	HR	TG 48:2	0.398776	0.209496
1750	Rhee et al. 2011	FHS	HR	TG 48:3	0.39069	0.23162
1752	Rhee et al. 2011	FHS	HR	TG 48:4	0.301585	0.15602
1760	Rhee et al. 2011	FHS	HR	TG 50:0	0.556181	0.196994
1774	Rhee et al. 2011	FHS	HR	TG 50:2	0.320633	0.180226
1781	Rhee et al. 2011	FHS	HR	TG 50:3	0.225541	0.246555
1786	Rhee et al. 2011	FHS	HR	TG 50:4	0.0834216	0.267118
1791	Rhee et al. 2011	FHS	HR	TG 50:5	0.0732505	0.181012
1814	Rhee et al. 2011	FHS	HR	TG 52:2	0.10075	0.216399
1820	Rhee et al. 2011	FHS	HR	TG 52:3	-0.0512933	0.166952
1824	Rhee et al. 2011	FHS	HR	TG 52:4	-0.102033	0.150872
1827	Rhee et al. 2011	FHS	HR	TG 52:5	-0.136966	0.173307
1832	Rhee et al. 2011	FHS	HR	TG 52:6	-0.0661398	0.163718
1845	Rhee et al. 2011	FHS	HR	TG 54:1	-0.102033	0.154453
1849	Rhee et al. 2011	FHS	HR	TG 54:2	0.178146	0.256227
1855	Rhee et al. 2011	FHS	HR	TG 54:3	-0.161343	0.19653
1861	Rhee et al. 2011	FHS	HR	TG 54:4	-0.216913	0.155095
1867	Rhee et al. 2011	FHS	HR	TG 54:5	-0.150823	0.13284
1873	Rhee et al. 2011	FHS	HR	TG 54:6	-0.133531	0.142429
1879	Rhee et al. 2011	FHS	HR	TG 54:7	-0.168419	0.151206
1885	Rhee et al. 2011	FHS	HR	TG 54:9	-0.0693501	0.174889
1890	Rhee et al. 2011	FHS	HR	TG 56:10	-0.181522	0.144609
1893	Rhee et al. 2011	FHS	HR	TG 56:3	-0.0565704	0.220269
1896	Rhee et al. 2011	FHS	HR	TG 56:4	-0.155485	0.158074
1901	Rhee et al. 2011	FHS	HR	TG 56:5	-0.134675	0.137244
1906	Rhee et al. 2011	FHS	HR	TG 56:6	-0.106472	0.126136
1910	Rhee et al. 2011	FHS	HR	TG 56:7	-0.154317	0.129082
1915	Rhee et al. 2011	FHS	HR	TG 56:8	-0.215672	0.135049
1918	Rhee et al. 2011	FHS	HR	TG 56:9	-0.358105	0.149239
1921	Rhee et al. 2011	FHS	HR	TG 58:10	-0.401971	0.145856
1928	Rhee et al. 2011	FHS	HR	TG 58:8	-0.133531	0.12294
1931	Rhee et al. 2011	FHS	HR	TG 58:9	-0.188742	0.125303
1933	Rhee et al. 2011	FHS	HR	TG 60:12	-0.295714	0.129604
468	Savolainen et al. 2017	GS	OR	Beta-alanine	-0.198451	0.15041
572	Savolainen et al. 2017	GS	OR	3-carboxy-4-methyl-5-propyl-2-furanpropionate	-0.34249	0.166618
673	Savolainen et al. 2017	GS	OR	Eicosapentaenoate	0.0582689	0.142759
889	Savolainen et al. 2017	GS	OR	Linoleate	-0.235722	0.158594
905	Savolainen et al. 2017	GS	OR	Laurate	0.300105	0.146307
1173	Savolainen et al. 2017	GS	OR	Oleate	-0.18633	0.143932
285	Shi et al. 2018	VIP	OR	Acylcarnitine C3	0.0198026	0.1136
573	Shi et al. 2018	VIP	OR	3-carboxy-4-methyl-5-propyl-2-furanpropionate	-0.139262	0.122697
659	Shi et al. 2018	VIP	OR	Docosahexaenoate	0.165514	0.117513
674	Shi et al. 2018	VIP	OR	Eicosapentaenoate	0.076961	0.108276
796	Shi et al. 2018	VIP	OR	Hippurate	0.0392207	0.109438
843	Shi et al. 2018	VIP	OR	Indolepropionate	-0.385662	0.126433
1102	Shi et al. 2018	VIP	OR	LPE 22:6	-0.223144	0.118898
1243	Shi et al. 2018	VIP	OR	PC 33:2	-0.223144	0.113847
1939	Shi et al. 2018	VIP	OR	Threonate	-0.0100503	0.120307
1954	Shi et al. 2018	VIP	OR	Trimethylamine N-oxide	0.0198026	0.111599
2033	Shi et al. 2018	VIP	OR	g-tocopherol	-0.139262	0.129561
68	Shi et al. 2018b	VIP	OR	3-methyl-2-oxovalerate	0.641854	0.141745
328	Shi et al. 2018b	VIP	OR	Acylcarnitine C5	0.00995033	0.075578
349	Shi et al. 2018b	VIP	OR	Acylcarnitine C5OH	0.357674	0.112871
417	Shi et al. 2018b	VIP	OR	Alanine	0.262364	0.101825
566	Shi et al. 2018b	VIP	OR	Citrulline	0.336472	0.108649
606	Shi et al. 2018b	VIP	OR	DG 30:0	0.10436	0.116617
611	Shi et al. 2018b	VIP	OR	DG 32:1	0.122218	0.138486
614	Shi et al. 2018b	VIP	OR	DG 32:2	-0.127833	0.125837
621	Shi et al. 2018b	VIP	OR	DG 34:1	0.182322	0.158809
702	Shi et al. 2018b	VIP	OR	Glutamate	-0.0100503	0.109734
842	Shi et al. 2018b	VIP	OR	Indolepropionate	-0.274437	0.0934854
864	Shi et al. 2018b	VIP	OR	Isoleucine	0.530628	0.13341
923	Shi et al. 2018b	VIP	OR	Leucine	0.48858	0.131525
971	Shi et al. 2018b	VIP	OR	LPC 17:0	-0.301105	0.10904
998	Shi et al. 2018b	VIP	OR	LPC 18:1	-0.328504	0.109231
1010	Shi et al. 2018b	VIP	OR	LPC 18:2	-0.287682	0.114526
1018	Shi et al. 2018b	VIP	OR	LPC 19:1	-0.446287	0.118014
1025	Shi et al. 2018b	VIP	OR	LPC 20:1	-0.261365	0.10208
1156	Shi et al. 2018b	VIP	OR	N-acetylglycine	-0.210721	0.103435
1210	Shi et al. 2018b	VIP	OR	PC 30:1	-0.139262	0.102233
1225	Shi et al. 2018b	VIP	OR	PC 32:1	0.0198026	0.0993514
1246	Shi et al. 2018b	VIP	OR	PC 33:3	-0.174353	0.108387
1286	Shi et al. 2018b	VIP	OR	PC 35:2	-0.371064	0.112385
1472	Shi et al. 2018b	VIP	OR	Phenylalanine	0.165514	0.1052
1975	Shi et al. 2018b	VIP	OR	Tryptophan	0.438255	0.115489
1994	Shi et al. 2018b	VIP	OR	Tyrosine	0.364643	0.124374
2025	Shi et al. 2018b	VIP	OR	Valine	0.270027	0.110621
130	Shi et al. 2019a	VIP	OR	Acylcarnitine C13	-0.103166	0.138991
1091	Shi et al. 2019a	VIP	OR	LPE 18:2	-0.299826	0.133232
1366	Shi et al. 2019a	VIP	OR	PC 38:6	-0.125093	0.0964481
1388	Shi et al. 2019a	VIP	OR	PC 40:6	0.216004	0.128297
1393	Shi et al. 2019a	VIP	OR	PC 40:9	-0.174353	0.125629
9	Shi et al. 2019b	VIP	OR	1-methylurate	-0.0100503	0.0950011
498	Shi et al. 2019b	VIP	OR	Caffeine	0.231112	0.100143
1199	Shi et al. 2019b	VIP	OR	Paraxanthine	0.0295588	0.0983833
1437	Shi et al. 2019b	VIP	OR	PE 36:4	0.34359	0.102692
1935	Shi et al. 2019b	VIP	OR	Theobromine	0.14842	0.100735
1937	Shi et al. 2019b	VIP	OR	Theophylline	0.122218	0.0960934
1960	Shi et al. 2019b	VIP	OR	Trigonelline	0.00995033	0.103435
177	Strand et al. 2018	WENBIT+	OR	Acylcarnitine C16	0.215111	0.0917233
256	Strand et al. 2018	WENBIT+	OR	Acylcarnitine C2	-0.0100503	0.0971358
286	Strand et al. 2018	WENBIT+	OR	Acylcarnitine C3	0.0487902	0.0964997
329	Strand et al. 2018	WENBIT+	OR	Acylcarnitine C5	0.0953102	0.0901553
385	Strand et al. 2018	WENBIT+	OR	Acylcarnitine C8	0.0953102	0.0893374
492	Strand et al. 2018	WENBIT+	OR	Carnitine	-0.0725707	0.0876968
598	Strand et al. 2018	WENBIT+	OR	Deoxycarnitine	-0.210721	0.100845
1964	Strand et al. 2018	WENBIT+	OR	Trimethyllysine	0.198851	0.0812382
100	Sun et al. 2016	NHAPC	HR	Acylcarnitine C10	0.223144	0.0569244
113	Sun et al. 2016	NHAPC	HR	Acylcarnitine C12	-0.235722	0.057642
121	Sun et al. 2016	NHAPC	HR	Acylcarnitine C12:1	-0.597837	0.0600291
123	Sun et al. 2016	NHAPC	HR	Acylcarnitine C12DC	-0.18633	0.0548754
127	Sun et al. 2016	NHAPC	HR	Acylcarnitine C12OH	-0.248461	0.0554625
140	Sun et al. 2016	NHAPC	HR	Acylcarnitine C14	-0.0943107	0.0588071
153	Sun et al. 2016	NHAPC	HR	Acylcarnitine C14:1OH	0.746688	0.0604468
164	Sun et al. 2016	NHAPC	HR	Acylcarnitine C14OH	0.722706	0.0605233
178	Sun et al. 2016	NHAPC	HR	Acylcarnitine C16	0.0953102	0.0579635
185	Sun et al. 2016	NHAPC	HR	Acylcarnitine C16:1	0.815365	0.0639691
194	Sun et al. 2016	NHAPC	HR	Acylcarnitine C16:2	0.760806	0.0606563
211	Sun et al. 2016	NHAPC	HR	Acylcarnitine C18	0.978326	0.0631441
222	Sun et al. 2016	NHAPC	HR	Acylcarnitine C18:1	0.565314	0.0549795
236	Sun et al. 2016	NHAPC	HR	Acylcarnitine C18:2	0.900161	0.0611027
243	Sun et al. 2016	NHAPC	HR	Acylcarnitine C18OH	0.307485	0.059859
257	Sun et al. 2016	NHAPC	HR	Acylcarnitine C2	0.10436	0.0594882
265	Sun et al. 2016	NHAPC	HR	Acylcarnitine C20	0.774727	0.061141
270	Sun et al. 2016	NHAPC	HR	Acylcarnitine C20:4	0.879627	0.0633111
287	Sun et al. 2016	NHAPC	HR	Acylcarnitine C3	0.0295588	0.0597124
292	Sun et al. 2016	NHAPC	HR	Acylcarnitine C3DC	0.314811	0.0594213
306	Sun et al. 2016	NHAPC	HR	Acylcarnitine C4	0.157004	0.0588792
330	Sun et al. 2016	NHAPC	HR	Acylcarnitine C5	0.182322	0.0616928
337	Sun et al. 2016	NHAPC	HR	Acylcarnitine C5:1	-0.139262	0.0556128
350	Sun et al. 2016	NHAPC	HR	Acylcarnitine C5OH	0.165514	0.0559599
360	Sun et al. 2016	NHAPC	HR	Acylcarnitine C6	-0.0512933	0.0563234
364	Sun et al. 2016	NHAPC	HR	Acylcarnitine C6DC	-0.040822	0.0557351
367	Sun et al. 2016	NHAPC	HR	Acylcarnitine C6OH	-0.127833	0.0582292
372	Sun et al. 2016	NHAPC	HR	Acylcarnitine C7DC	-0.174353	0.0603033
386	Sun et al. 2016	NHAPC	HR	Acylcarnitine C8	0.0676586	0.0569244
392	Sun et al. 2016	NHAPC	HR	Acylcarnitine C8:1	0.270027	0.060419
493	Sun et al. 2016	NHAPC	HR	Carnitine	0.223144	0.0592123
596	Sun et al. 2016	NHAPC	HR	3-dehydrocarnitine	-0.494296	0.0588071
599	Sun et al. 2016	NHAPC	HR	Deoxycarnitine	-0.755023	0.0654898
479	Svingen et al. 2016	WENBIT+	OR	Betaine	-0.301105	0.0852556
550	Svingen et al. 2016	WENBIT+	OR	Choline	-0.116534	0.0882528
667	Svingen et al. 2016	WENBIT+	OR	Dimethylglycine	-0.0833816	0.0886588
1524	Svingen et al. 2016	WENBIT+	OR	Sarcosine	0.0676586	0.0830159
1955	Svingen et al. 2016	WENBIT+	OR	Trimethylamine N-oxide	0.076961	0.0850325
418	Tillin et al. 2015	SABRE	OR	Alanine	0.127779	0.0778076
721	Tillin et al. 2015	SABRE	OR	Glutamine	-0.0618754	0.071555
753	Tillin et al. 2015	SABRE	OR	Glycine	-0.132514	0.0733176
815	Tillin et al. 2015	SABRE	OR	Histidine	0.0346481	0.0767197
924	Tillin et al. 2015	SABRE	OR	Leucine	0.144387	0.0770842
419	Vangipurapu et al. 2019	METSIM	HR	Alanine	0.239017	0.0439541
447	Vangipurapu et al. 2019	METSIM	HR	Arginine	0.139762	0.0444779
456	Vangipurapu et al. 2019	METSIM	HR	Asparagine	-0.0943107	0.041914
462	Vangipurapu et al. 2019	METSIM	HR	Aspartate	0.307485	0.0430864
703	Vangipurapu et al. 2019	METSIM	HR	Glutamate	0.431782	0.0446949
722	Vangipurapu et al. 2019	METSIM	HR	Glutamine	-0.248461	0.0423431
754	Vangipurapu et al. 2019	METSIM	HR	Glycine	-0.18633	0.0431317
816	Vangipurapu et al. 2019	METSIM	HR	Histidine	-0.162519	0.0421122
865	Vangipurapu et al. 2019	METSIM	HR	Isoleucine	0.277632	0.0443936
925	Vangipurapu et al. 2019	METSIM	HR	Leucine	0.231112	0.0446553
1115	Vangipurapu et al. 2019	METSIM	HR	Lysine	0.10436	0.043576
1136	Vangipurapu et al. 2019	METSIM	HR	Methionine	0.10436	0.0456756
1473	Vangipurapu et al. 2019	METSIM	HR	Phenylalanine	0.239017	0.0402569
1545	Vangipurapu et al. 2019	METSIM	HR	Serine	-0.0618754	0.0430665
1947	Vangipurapu et al. 2019	METSIM	HR	Threonine	0.0295588	0.0419954
1976	Vangipurapu et al. 2019	METSIM	HR	Tryptophan	0.131028	0.0448701
1995	Vangipurapu et al. 2019	METSIM	HR	Tyrosine	0.300105	0.0416646
2026	Vangipurapu et al. 2019	METSIM	HR	Valine	0.239017	0.0439541
20	Vangipurapu et al. 2020	METSIM	HR	2-hydroxybutyrate	0.285179	0.0479123
28	Vangipurapu et al. 2020	METSIM	HR	2-hydroxyisobutyrate	0.285179	0.0479123
49	Vangipurapu et al. 2020	METSIM	HR	3-hydroxyisobutyrate	0.157004	0.0437138
466	Vangipurapu et al. 2020	METSIM	HR	Benzoate	0	0.0432549
480	Vangipurapu et al. 2020	METSIM	HR	Betaine	-0.0618754	0.0435269
551	Vangipurapu et al. 2020	METSIM	HR	Choline	0.0295588	0.0446949
581	Vangipurapu et al. 2020	METSIM	HR	Creatine	0.357674	0.0465106
593	Vangipurapu et al. 2020	METSIM	HR	Creatinine	0.0392207	0.044263
668	Vangipurapu et al. 2020	METSIM	HR	Dimethylglycine	0.182322	0.0340641
766	Vangipurapu et al. 2020	METSIM	HR	Glycocholate	0.19062	0.041914
797	Vangipurapu et al. 2020	METSIM	HR	Hippurate	-0.139262	0.0438394
820	Vangipurapu et al. 2020	METSIM	HR	Hydrocinnamate	-0.139262	0.0411398
833	Vangipurapu et al. 2020	METSIM	HR	Indoleacetate	0.0198026	0.042407
836	Vangipurapu et al. 2020	METSIM	HR	Indolelactate	0.157004	0.0437138
844	Vangipurapu et al. 2020	METSIM	HR	Indolepropionate	-0.198451	0.0373988
875	Vangipurapu et al. 2020	METSIM	HR	Kynurenine	0.215111	0.0431317
901	Vangipurapu et al. 2020	METSIM	HR	Lactate	0.173953	0.0449456
952	Vangipurapu et al. 2020	METSIM	HR	LPC 16:0	-0.125085	0.0306101
963	Vangipurapu et al. 2020	METSIM	HR	LPC 16:1	0.0582689	0.043423
986	Vangipurapu et al. 2020	METSIM	HR	LPC 18:0	-0.198451	0.0402806
999	Vangipurapu et al. 2020	METSIM	HR	LPC 18:1	-0.261365	0.0428913
1011	Vangipurapu et al. 2020	METSIM	HR	LPC 18:2	-0.400478	0.0416638
1016	Vangipurapu et al. 2020	METSIM	HR	LPC 18:3	-0.198451	0.0436595
1062	Vangipurapu et al. 2020	METSIM	HR	LPC 24:0	-0.248461	0.0423424
1070	Vangipurapu et al. 2020	METSIM	HR	LPE 16:0	-0.127833	0.0433408
1078	Vangipurapu et al. 2020	METSIM	HR	LPE 18:0	-0.00176015	0.0306451
1085	Vangipurapu et al. 2020	METSIM	HR	LPE 18:1	0.0392207	0.0438385
1092	Vangipurapu et al. 2020	METSIM	HR	LPE 18:2	-0.127833	0.0433408
1098	Vangipurapu et al. 2020	METSIM	HR	LPE 20:4	0.0953102	0.0439715
1140	Vangipurapu et al. 2020	METSIM	HR	MG 16:1	0.34359	0.0488243
1145	Vangipurapu et al. 2020	METSIM	HR	MG 18:1	0.22744	0.0328172
1147	Vangipurapu et al. 2020	METSIM	HR	MG 18:2	-0.0128737	0.0505234
1157	Vangipurapu et al. 2020	METSIM	HR	N-acetylglycine	-0.139262	0.0497195
1549	Vangipurapu et al. 2020	METSIM	HR	Serotonin	-0.116534	0.0371193
1689	Vangipurapu et al. 2020	METSIM	HR	Spermidine	-0.127833	0.0433416
1704	Vangipurapu et al. 2020	METSIM	HR	Succinate	0	0.0432549
1714	Vangipurapu et al. 2020	METSIM	HR	Taurochenodeoxycholate	0.207014	0.0415718
1956	Vangipurapu et al. 2020	METSIM	HR	Trimethylamine N-oxide	0.0487902	0.0434238
2001	Vangipurapu et al. 2020	METSIM	HR	Urea	0.076961	0.0469397
2004	Vangipurapu et al. 2020	METSIM	HR	Urate	0.329304	0.0458402
2009	Vangipurapu et al. 2020	METSIM	HR	Uridine	0.157004	0.0457147
2031	Vangipurapu et al. 2020	METSIM	HR	Xanthine	0.270027	0.0408256
866	Wang et al. 2011	FHS	OR	Isoleucine	0.314811	0.184755
926	Wang et al. 2011	FHS	OR	Leucine	0.470004	0.17795
432	Wang et al. 2013	FHS	OR	Aminoadipate	0.314811	0.0929601
433	Wang et al. 2013	MDC	OR	Aminoadipate	0.451076	0.15843
258	Wang-Sattler et al. 2012	KORA	OR	Acylcarnitine C2	-0.105361	0.124414
755	Wang-Sattler et al. 2012	KORA	OR	Glycine	-0.162519	0.155373
867	Wang-Sattler et al. 2012	KORA	OR	Isoleucine	0.548121	0.208099
927	Wang-Sattler et al. 2012	KORA	OR	Leucine	0.357674	0.191982
1012	Wang-Sattler et al. 2012	KORA	OR	LPC 18:2	-0.371064	0.163085
953	Yang et al. 2018	KoGES	HR	LPC 16:0	0.00697561	0.0615411
964	Yang et al. 2018	KoGES	HR	LPC 16:1	0.0372958	0.0626378
972	Yang et al. 2018	KoGES	HR	LPC 17:0	-0.234457	0.0709766
987	Yang et al. 2018	KoGES	HR	LPC 18:0	-0.0779615	0.0638399
1000	Yang et al. 2018	KoGES	HR	LPC 18:1	-0.211956	0.0684122
1013	Yang et al. 2018	KoGES	HR	LPC 18:2	-0.29303	0.0887081
1036	Yang et al. 2018	KoGES	HR	LPC 20:3	0.0198026	0.0596939
1045	Yang et al. 2018	KoGES	HR	LPC 20:4	-0.0608121	0.064841
1201	Yang et al. 2018	KoGES	HR	PC 28:1	0.0497421	0.0646198
1206	Yang et al. 2018	KoGES	HR	PC 30:0	0.0567793	0.0442118
1217	Yang et al. 2018	KoGES	HR	PC 32:0	0.200489	0.0606935
1226	Yang et al. 2018	KoGES	HR	PC 32:1	0.091834	0.053276
1233	Yang et al. 2018	KoGES	HR	PC 32:2	-0.0910194	0.0607145
1236	Yang et al. 2018	KoGES	HR	PC 32:3	-0.0758017	0.063123
1252	Yang et al. 2018	KoGES	HR	PC 34:0	0.00697561	0.0587561
1259	Yang et al. 2018	KoGES	HR	PC 34:1	0.136307	0.049186
1268	Yang et al. 2018	KoGES	HR	PC 34:2	0.00130854	0.0433386
1277	Yang et al. 2018	KoGES	HR	PC 34:3	-0.0554878	0.0485227
1282	Yang et al. 2018	KoGES	HR	PC 34:4	0.157004	0.0632529
1290	Yang et al. 2018	KoGES	HR	PC 36:0	-0.152059	0.0445815
1296	Yang et al. 2018	KoGES	HR	PC 36:1	0.146183	0.0458797
1305	Yang et al. 2018	KoGES	HR	PC 36:2	0.00377208	0.0429119
1311	Yang et al. 2018	KoGES	HR	PC 36:3	-0.0544456	0.0457718
1318	Yang et al. 2018	KoGES	HR	PC 36:4	-0.00346851	0.0448243
1323	Yang et al. 2018	KoGES	HR	PC 36:5	0.0519339	0.043774
1326	Yang et al. 2018	KoGES	HR	PC 36:6	0.0788112	0.0627767
1331	Yang et al. 2018	KoGES	HR	PC 38:0	-0.131456	0.0460631
1333	Yang et al. 2018	KoGES	HR	PC 38:1	-0.148404	0.0407298
1340	Yang et al. 2018	KoGES	HR	PC 38:2	0.0676586	0.0596976
1347	Yang et al. 2018	KoGES	HR	PC 38:3	0.0107912	0.0443059
1353	Yang et al. 2018	KoGES	HR	PC 38:4	-0.0293254	0.0440705
1358	Yang et al. 2018	KoGES	HR	PC 38:5	0.0609729	0.0438755
1367	Yang et al. 2018	KoGES	HR	PC 38:6	0.0164857	0.0449254
1371	Yang et al. 2018	KoGES	HR	PC 40:1	-0.221327	0.0474447
1373	Yang et al. 2018	KoGES	HR	PC 40:2	-0.131226	0.0434156
1375	Yang et al. 2018	KoGES	HR	PC 40:3	-0.156969	0.0429361
1378	Yang et al. 2018	KoGES	HR	PC 40:4	-0.0816085	0.0445184
1382	Yang et al. 2018	KoGES	HR	PC 40:5	0.0764652	0.0471163
1389	Yang et al. 2018	KoGES	HR	PC 40:6	0.0305344	0.0442768
1395	Yang et al. 2018	KoGES	HR	PC 42:0	-0.152579	0.0450146
1397	Yang et al. 2018	KoGES	HR	PC 42:1	-0.225634	0.0483
1399	Yang et al. 2018	KoGES	HR	PC 42:2	-0.137772	0.0439542
1401	Yang et al. 2018	KoGES	HR	PC 42:3	-0.169603	0.0628689
1403	Yang et al. 2018	KoGES	HR	PC 42:4	-0.13644	0.0433141
1405	Yang et al. 2018	KoGES	HR	PC 42:5	0.0408857	0.0442372
1407	Yang et al. 2018	KoGES	HR	PC 42:6	0.0478373	0.0575113
1409	Yang et al. 2018	KoGES	HR	PC 44:3	-0.121038	0.0596226
1411	Yang et al. 2018	KoGES	HR	PC 44:4	-0.12897	0.0616066
1414	Yang et al. 2018	KoGES	HR	PC 44:5	-0.0576291	0.0596234
1416	Yang et al. 2018	KoGES	HR	PC 44:6	-0.158996	0.0633245
149	Yang et al. 2018	KoGES	HR	Acylcarnitine C14:1	-0.0954102	0.0655724
160	Yang et al. 2018	KoGES	HR	Acylcarnitine C14:2	0.0158733	0.0581212
179	Yang et al. 2018	KoGES	HR	Acylcarnitine C16	-0.0512933	0.0629589
212	Yang et al. 2018	KoGES	HR	Acylcarnitine C18	-0.0491902	0.0639041
223	Yang et al. 2018	KoGES	HR	Acylcarnitine C18:1	0.0934903	0.0585218
237	Yang et al. 2018	KoGES	HR	Acylcarnitine C18:2	-0.036664	0.0645752
259	Yang et al. 2018	KoGES	HR	Acylcarnitine C2	-0.0429075	0.0635865
288	Yang et al. 2018	KoGES	HR	Acylcarnitine C3	0.0751075	0.0646586
307	Yang et al. 2018	KoGES	HR	Acylcarnitine C4	-0.0429075	0.0617504
331	Yang et al. 2018	KoGES	HR	Acylcarnitine C5	0.0449734	0.0637227
373	Yang et al. 2018	KoGES	HR	Acylcarnitine C7DC	-0.114289	0.0653631
387	Yang et al. 2018	KoGES	HR	Acylcarnitine C8	-0.0888312	0.0635792
420	Yang et al. 2018	KoGES	HR	Alanine	0.385262	0.116632
448	Yang et al. 2018	KoGES	HR	Arginine	0.242162	0.0733103
457	Yang et al. 2018	KoGES	HR	Asparagine	-0.105361	0.0625894
463	Yang et al. 2018	KoGES	HR	Aspartate	0.0440169	0.0591777
494	Yang et al. 2018	KoGES	HR	Carnitine	-0.0855579	0.0628106
567	Yang et al. 2018	KoGES	HR	Citrulline	0.0401818	0.0633886
594	Yang et al. 2018	KoGES	HR	Creatinine	-0.138113	0.0776757
704	Yang et al. 2018	KoGES	HR	Glutamate	0.162969	0.0592754
723	Yang et al. 2018	KoGES	HR	Glutamine	0.0382587	0.0619562
756	Yang et al. 2018	KoGES	HR	Glycine	-0.213193	0.0688127
817	Yang et al. 2018	KoGES	HR	Histidine	0.0695261	0.0622287
868	Yang et al. 2018	KoGES	HR	Isoleucine	0.303063	0.0917472
876	Yang et al. 2018	KoGES	HR	Kynurenine	-0.0345914	0.0613929
928	Yang et al. 2018	KoGES	HR	Leucine	0.204572	0.0660301
1116	Yang et al. 2018	KoGES	HR	Lysine	0.111541	0.0625169
1137	Yang et al. 2018	KoGES	HR	Methionine	0.162969	0.0656572
1185	Yang et al. 2018	KoGES	HR	Ornithine	0.0430595	0.061693
1474	Yang et al. 2018	KoGES	HR	Phenylalanine	0.201307	0.0649761
1508	Yang et al. 2018	KoGES	HR	Putrescine	-0.0222456	0.055941
1525	Yang et al. 2018	KoGES	HR	Sarcosine	-0.00803217	0.0626986
1532	Yang et al. 2018	KoGES	HR	SDMA+ADMA	0.0344014	0.0612122
1546	Yang et al. 2018	KoGES	HR	Serine	-0.0253178	0.0595896
1550	Yang et al. 2018	KoGES	HR	Serotonin	0.0421012	0.06032
1577	Yang et al. 2018	KoGES	HR	SM 34:1	-0.163696	0.0617187
1587	Yang et al. 2018	KoGES	HR	SM 34:2	-0.235722	0.0713609
1602	Yang et al. 2018	KoGES	HR	SM 36:1	0.0344014	0.0599789
1612	Yang et al. 2018	KoGES	HR	SM 36:2	-0.161343	0.0663888
1668	Yang et al. 2018	KoGES	HR	SM 42:1	0.0188218	0.0576677
1676	Yang et al. 2018	KoGES	HR	SM 42:2	-0.183923	0.0618618
1687	Yang et al. 2018	KoGES	HR	SM 44:2	-0.179127	0.0602486
1690	Yang et al. 2018	KoGES	HR	Spermidine	-0.0544562	0.0575999
1710	Yang et al. 2018	KoGES	HR	Taurine	0.0148886	0.0591144
1948	Yang et al. 2018	KoGES	HR	Threonine	-0.0110609	0.0623168
1977	Yang et al. 2018	KoGES	HR	Tryptophan	0.0788112	0.0637224
1996	Yang et al. 2018	KoGES	HR	Tyrosine	0.24059	0.0728346
2027	Yang et al. 2018	KoGES	HR	Valine	0.375693	0.113735
5	Yu et al. 2016	SWHS & SMHS	HR	1,5-anhydrosorbitol	-0.71335	0.0823402
13	Yu et al. 2016	SWHS & SMHS	HR	2-aminobutyrate	0.631272	0.140455
21	Yu et al. 2016	SWHS & SMHS	HR	2-hydroxybutyrate	0.672944	0.135364
30	Yu et al. 2016	SWHS & SMHS	HR	2-ketobutyrate	0.593327	0.148894
50	Yu et al. 2016	SWHS & SMHS	HR	3-hydroxyisobutyrate	0.41871	0.132916
54	Yu et al. 2016	SWHS & SMHS	HR	3-hydroxypyruvate	0.512824	0.160638
57	Yu et al. 2016	SWHS & SMHS	HR	3-methoxytyrosine	-0.494296	0.137961
63	Yu et al. 2016	SWHS & SMHS	HR	3-methyl-2-oxobutyrate	0.678034	0.135662
69	Yu et al. 2016	SWHS & SMHS	HR	3-methyl-2-oxovalerate	0.636577	0.139704
75	Yu et al. 2016	SWHS & SMHS	HR	4-methyl-2-oxopentanoate	0.593327	0.13504
568	Yu et al. 2016	SWHS & SMHS	HR	Citrulline	-0.0202027	0.127648
670	Yu et al. 2016	SWHS & SMHS	HR	Docosapentaenoate	0.482426	0.132345
679	Yu et al. 2016	SWHS & SMHS	HR	Fructose	0.542324	0.118016
687	Yu et al. 2016	SWHS & SMHS	HR	Gluconate	0.431782	0.135873
691	Yu et al. 2016	SWHS & SMHS	HR	Glucose	0.756122	0.100011
757	Yu et al. 2016	SWHS & SMHS	HR	Glycine	-0.544727	0.124706
877	Yu et al. 2016	SWHS & SMHS	HR	Kynurenine	-0.0833816	0.133881
1125	Yu et al. 2016	SWHS & SMHS	HR	Mannose	0.924259	0.120379
1454	Yu et al. 2016	SWHS & SMHS	HR	Pelargonate	-0.0304592	0.128264
1506	Yu et al. 2016	SWHS & SMHS	HR	Pseudouridine	-0.415515	0.141297
1519	Yu et al. 2016	SWHS & SMHS	HR	Pyruvate	0.494696	0.129508
1533	Yu et al. 2016	SWHS & SMHS	HR	SDMA+ADMA	-0.0618754	0.13243
2028	Yu et al. 2016	SWHS & SMHS	HR	Valine	0.587787	0.14089
872	Yu et al. 2018	PREDIMED	HR	Kynurenate	0.0676586	0.104411
878	Yu et al. 2018	PREDIMED	HR	Kynurenine	-0.0100503	0.0971358
1521	Yu et al. 2018	PREDIMED	HR	Quinolinate	-0.0304592	0.0969764
1978	Yu et al. 2018	PREDIMED	HR	Tryptophan	0.254642	0.111483
449	Yu et al. 2019	PREDIMED	HR	Arginine	-0.385662	0.168892
569	Yu et al. 2019	PREDIMED	HR	Citrulline	-0.150823	0.134909
1166	Yu et al. 2019	PREDIMED	HR	NMMA	0.076961	0.165112
1186	Yu et al. 2019	PREDIMED	HR	Ornithine	-0.0618754	0.159619
1534	Yu et al. 2019	PREDIMED	HR	SDMA+ADMA	-0.1444	0.1088
500	Yun et al. 2020	NHAPC	RR	Cer d18:0/16:0	0.0676586	0.0378622
502	Yun et al. 2020	NHAPC	RR	Cer d18:0/18:0	0.122218	0.040722
[truncated: 36 more rows]
